# Supplementary material
Source: MDPI journal article supplement (https://www.mdpi.com/2076-3298/9/6/73)
Supplement: s1 [file s1]

Archive with 2 entries (2 files):
- environments-1724408-Appendix A.pdf
- environments-1724408-SI.pdf
