# Supplementary material
Source: MDPI journal article supplement (https://www.mdpi.com/2076-3298/9/6/73)
Supplement: s1 [file s1 › environments-1724408-SI.pdf]

Supplemental information for:

Incorporating Industrial and Climatic Covariates into Analyses of Fish Health Indicators Measured in a Stream in Canada's Oil Sands Region

Tim J. Arciszewski, Erin J. Ussery, Mark E. McMaster

Environments

# Supplemental Tables

Supplemental Table S1. Environmental covariates; WT=water temperature; AT=air temperature; SD=stream discharge; P=precipitation; WS=wind speed; WG=wind gusts;  $\bar{x}$  = mean;  $\tilde{x}$  =median; values of environmental covariates by site shown in SI Figures 1-3.

| Season | Period                           | Estimator                 | WT               | AT               | SD               | P             | WS               | WG      |
|--------|----------------------------------|---------------------------|------------------|------------------|------------------|---------------|------------------|---------|
| Summer | August 4 to start of fishing     | Mean                      | WT1- $\bar{x}$   | AT1- $\bar{x}$   | SD1- $\bar{x}$   | P1- $\bar{x}$ | WS1- $\bar{x}$   |         |
|        |                                  | Median                    | WT1- $\tilde{x}$ | AT1- $\tilde{x}$ | SD1- $\tilde{x}$ |               | WS1- $\tilde{x}$ |         |
|        |                                  | 75 <sup>th</sup> p-tile   |                  |                  |                  | P1-75         |                  | WG1-75  |
|        |                                  | 99 <sup>th</sup> p-tile   |                  |                  |                  | P1-99         |                  | WG1-99  |
|        |                                  | 99.9 <sup>th</sup> p-tile |                  |                  |                  |               |                  | WG1-999 |
|        |                                  | Sum                       |                  |                  |                  | P1-TP         |                  |         |
|        |                                  | Count                     |                  |                  |                  | P1-RD         |                  |         |
|        | 60 days prior to fish collection | Mean                      |                  | AT2- $\bar{x}$   | SD2- $\bar{x}$   | P2- $\bar{x}$ | WS2- $\bar{x}$   |         |
|        |                                  | Median                    |                  | AT2- $\tilde{x}$ | SD2- $\tilde{x}$ |               | WS2- $\tilde{x}$ |         |
|        |                                  | 75 <sup>th</sup> p-tile   |                  |                  |                  | P2-75         |                  | WG2-75  |
|        |                                  | 99 <sup>th</sup> p-tile   |                  |                  |                  | P2-99         |                  | WG2-99  |
|        |                                  | 99.9 <sup>th</sup> p-tile |                  |                  |                  |               |                  | WG2-999 |
|        |                                  | Sum                       |                  |                  |                  | P2-TP         |                  |         |
|        |                                  | Count                     |                  |                  |                  | P2-RD         |                  |         |
|        | June 1- August 31                | Mean                      |                  | AT3- $\bar{x}$   | SD3- $\bar{x}$   | P3- $\bar{x}$ | WS3- $\bar{x}$   |         |
|        |                                  | Median                    |                  | AT3- $\tilde{x}$ | SD3- $\tilde{x}$ |               | WS3- $\tilde{x}$ |         |
|        |                                  | 75 <sup>th</sup> p-tile   |                  |                  |                  | P3-75         |                  | WG3-75  |
|        |                                  | 99 <sup>th</sup> p-tile   |                  |                  |                  | P3-99         |                  | WG3-99  |
|        |                                  | 99.9 <sup>th</sup> p-tile |                  |                  |                  |               |                  | WG3-999 |
|        |                                  | Sum                       |                  |                  |                  | P3-TP         |                  |         |
|        |                                  | Count                     |                  |                  |                  | P3-RD         |                  |         |
|        | June 1- first fishing day        | Mean                      |                  | AT4- $\bar{x}$   | SD4- $\bar{x}$   | P4- $\bar{x}$ | WS4- $\bar{x}$   |         |
|        |                                  | Median                    |                  | AT4- $\tilde{x}$ | SD4- $\tilde{x}$ |               | WS4- $\tilde{x}$ |         |
|        |                                  | 75 <sup>th</sup> p-tile   |                  |                  |                  | P4-75         |                  | WG4-75  |
|        |                                  | 99 <sup>th</sup> p-tile   |                  |                  |                  | P4-99         |                  | WG4-99  |
|        |                                  | 99.9 <sup>th</sup> p-tile |                  |                  |                  |               |                  | WG4-999 |
|        |                                  | Sum                       |                  |                  |                  | P4-TP         |                  |         |
|        |                                  | Count                     |                  |                  |                  | P4-RD         |                  |         |
| Spring | April 1- June 30                 | Mean                      |                  | SP-MT            | SP-SD            | SP-MP         |                  |         |
|        |                                  | 75 <sup>th</sup> p-tile   |                  |                  |                  | SP-75         |                  |         |
|        |                                  | 99 <sup>th</sup> p-tile   |                  |                  |                  | SP-99         |                  |         |
|        |                                  | Sum                       |                  |                  |                  | SP-TP         |                  |         |
|        |                                  | Count                     |                  |                  |                  | SP-RD         |                  |         |

Supplemental Table S2. Industrial variable names and codes.

| Code      | Feature name                                     | Code       | Feature name                                        |
|-----------|--------------------------------------------------|------------|-----------------------------------------------------|
| HM-CB-P   | Horizon mine crude bitumen production            | SBM-CB-FW  | Suncor Basemine crude bitumen flared/wasted         |
| HM-DN-F   | Horizon mine diluent naphtha fuel                | SBM-CB-P   | Suncor Basemine crude bitumen production            |
| HM-DN-FW  | Horizon mine diluent naphtha flared/wasted       | SBM-DN-FW  | Suncor Basemine diluent naphtha flared/wasted       |
| HM-IH-P   | Horizon mine intermediate hydrocarbon production | SBM-NG-F   | Suncor Basemine natural gas fuel                    |
| HM-NG-F   | Horizon mine natural gas fuel                    | SBM-NG-PU  | Suncor Basemine natural gas plant use               |
| HM-NG-FW  | Horizon mine natural gas flared/wasted           | SBM-OS-M   | Suncor Basemine oil sand mined                      |
| HM-NG-PU  | Horizon mine natural gas plant use               | SBM-PC-F   | Suncor Basemine petroleum coke fuel                 |
| HM-OS-M   | Horizon mine oil sand mined                      | SBM-PC-P   | Suncor Basemine petroleum coke production           |
| HM-PC-P   | Horizon mine petroleum coke production           | SBM-PC-SP  | Suncor Basemine petroleum coke stockpiled           |
| HM-PC-SP  | Horizon mine petroleum coke stockpiled           | SBM-PG-F   | Suncor Basemine process gas fuel                    |
| HM-PG-F   | Horizon mine process gas fuel                    | SBM-PG-FW  | Suncor Basemine process gas flared/wasted           |
| HM-PG-FW  | Horizon mine process gas flared/wasted           | SBM-PG-P   | Suncor Basemine process gas production              |
| HM-PG-P   | Horizon mine process gas production              | SBM-S-FW   | Suncor Basemine sulphur flared/wasted               |
| HM-S-FW   | Horizon mine sulphur flared/wasted               | SBM-S-P    | Suncor Basemine sulphur production                  |
| HM-S-P    | Horizon mine sulphur production                  | SBM-SCO-F  | Suncor Basemine synthetic crude fuel                |
| HM-SCO-F  | Horizon mine synthetic crude fuel                | SBM-SCO-FW | Suncor Basemine synthetic crude flared/wasted       |
| HM-SCO-P  | Horizon mine synthetic crude production          | SBM-SCO-P  | Suncor Basemine synthetic crude production          |
| HS-BR     | Husky Sunrise bitumen production                 | SFB-BR     | Suncor Firebag bitumen production rate              |
| HS-ST     | Husky Sunrise Steam injection                    | SFB-ST     | Suncor Firebag steam injection rate                 |
| JPM-CB-P  | Jackpine Mine crude bitumen production           | SML-CB-FW  | Syncrude Mildred Lake crude bitumen flared/wasted   |
| JPM-NG-F  | Jackpine Mine natural gas fuel                   | SML-CB-P   | Syncrude Mildred Lake crude bitumen production      |
| JPM-OS-M  | Jackpine Mine oil sand mined                     | SML-DN-FW  | Syncrude Mildred Lake diluent naphtha flared/wasted |
| KM-CB-FW  | Kearl Mine crude bitumen flared/wasted           | SML-NG-F   | Syncrude Mildred Lake natural gas fuel              |
| KM-CB-P   | Kearl Mine crude bitumen production              | SML-OS-M   | Syncrude Mildred Lake oil sand mined                |
| KM-DN-F   | Kearl Mine diluent naphtha fuel                  | SML-PC-F   | Syncrude Mildred Lake petroleum coke fuel           |
| KM-DN-FW  | Kearl Mine diluent naphtha flared/wasted         | SML-PC-P   | Syncrude Mildred Lake petroleum coke production     |
| KM-NG-F   | Kearl Mine natural gas fuel                      | SML-PC-SP  | Syncrude Mildred Lake petroleum coke stockpiled     |
| KM-NG-FW  | Kearl Mine natural gas flared/wasted             | SML-PG-F   | Syncrude Mildred Lake process gas fuel              |
| KM-OS-M   | Kearl Mine oil sand mined                        | SML-PG-FW  | Syncrude Mildred Lake process gas flared/wasted     |
| KM-SCO-F  | Kearl Mine synthetic crude fuel                  | SML-PG-P   | Syncrude Mildred Lake process gas production        |
| MRM-CB-FW | Muskeg River Mine crude bitumen flared/wasted    | SML-S-FW   | Syncrude Mildred Lake sulphur flared/wasted         |
| MRM-CB-P  | Muskeg River Mine crude bitumen production       | SML-S-P    | Syncrude Mildred Lake sulphur production            |
| MRM-DN-F  | Muskeg River Mine diluent naphtha fuel           | SML-SCO-F  | Syncrude Mildred Lake synthetic crude fuel          |
| MRM-DN-FW | Muskeg River Mine diluent naphtha flared/wasted  | SML-SCO-P  | Syncrude Mildred Lake synthetic crude production    |
| MRM-NG-F  | Muskeg River Mine natural gas fuel               | SMR-BR     | Suncor MacKay River bitumen production              |
| MRM-NG-FW | Muskeg River Mine natural gas flared/wasted      | SMR-ST     | Suncor MacKay River steam injection                 |
| MRM-OS-M  | Muskeg River Mine oil sand mined                 | WE-BR      | West Ells Sunshine bitumen production               |
| SAN-CB-P  | Syncrude Aurora North crude bitumen production   | WE-ST      | West Ells steam injection                           |
| SAN-NG-F  | Syncrude Aurora North natural gas fuel           |            |                                                     |
| SAN-OS-M  | Syncrude Aurora North oil sand mined             |            |                                                     |
| SAN-SCO-F | Syncrude Aurora North Synthetic crude fuel       |            |                                                     |

Supplemental Table S3. Distances from oil sands project boundaries to fish sampling locations; arranged by distance from Lower Ells.

| Facility type | Facility                      | Facility code | Distance of site to industrial facility (km) |       |
|---------------|-------------------------------|---------------|----------------------------------------------|-------|
|               |                               |               | Upper                                        | Lower |
| Mine          | Horizon Mine                  | HM            | 9                                            | 5     |
|               | Muskeg River Mine             | MRM           | 16                                           | 6     |
|               | Aurora North Mine             | SAN           | 18                                           | 7     |
|               | Mildred Lake Mine             | SML           | 14                                           | 15    |
|               | Jackpine Mine                 | JPM           | 26                                           | 16    |
| In situ       | Suncor MacKay River (in situ) | SMR           | 15                                           | 22    |
| Mine          | Suncor Basemine               | SBM           | 30                                           | 28    |
|               | Kearl Mine                    | KM            | 38                                           | 28    |
| In situ       | Husky Sunrise (in situ)       | HS            | 45                                           | 36    |
|               | Suncor Firebag (in situ)      | SFB           | 54                                           | 45    |
|               | Sunshine West Ells (in situ)  | SWE           | 46                                           | 57    |

Supplemental table S4. Female Lake Chub metrics (mean  $\pm$  SD(n)); \* denote significant difference at Lower site compared to Upper site ( $p < 0.05$ ).

| Site       | Date | Age (year)           | Length (cm)           | Weight (g)            | Gonad weight (g)      | Liver weight (g)      |
|------------|------|----------------------|-----------------------|-----------------------|-----------------------|-----------------------|
| Lower Ells | 2013 | 1.1 $\pm$ 0.55 (20)  | 73.4 $\pm$ 10.9 (20)  | 4.39 $\pm$ 2.28 (20)  | 0.35 $\pm$ 0.29 (20)  | 0.09 $\pm$ 0.05 (20)  |
|            | 2014 | 0.95 $\pm$ 0.39 (21) | 81.9 $\pm$ 8.17 (21)* | 6.07 $\pm$ 1.93 (21)* | 0.32 $\pm$ 0.19 (21)* | 0.11 $\pm$ 0.06 (21)* |
|            | 2015 | 2.2 $\pm$ 1.0 (20)*  | 79.9 $\pm$ 10.2 (20)  | 5.62 $\pm$ 2.31 (20)  | 0.31 $\pm$ 0.19 (20)* | 0.11 $\pm$ 0.05 (20)* |
|            | 2018 | 2.1 $\pm$ 0.8 (18)   | 68.6 $\pm$ 8.01 (20)* | 3.07 $\pm$ 0.91 (19)  | 0.12 $\pm$ 0.08 (19)* | 0.04 $\pm$ 0.02 (19)  |
| Upper Ells | 2013 | 2.17 $\pm$ 0.47 (12) | 81.3 $\pm$ 16.1 (12)  | 6.02 $\pm$ 3.32 (12)  | 0.43 $\pm$ 0.28 (12)  | 0.10 $\pm$ 0.06 (12)  |
|            | 2014 | 1.0 $\pm$ 0.35 (17)  | 62.8 $\pm$ 4.57 (18)  | 2.43 $\pm$ 0.57 (18)  | 0.12 $\pm$ 0.05 (18)  | 0.04 $\pm$ 0.02 (18)  |
|            | 2015 | 3.2 $\pm$ 1.0 (20)   | 85.1 $\pm$ 8.48 (20)  | 6.79 $\pm$ 2.36 (20)  | 0.52 $\pm$ 0.30 (20)  | 0.16 $\pm$ 0.07 (19)  |
|            | 2018 | 2.7 $\pm$ 0.7 (16)   | 75.4 $\pm$ 12.2 (20)  | 4.18 $\pm$ 1.81 (19)  | 0.26 $\pm$ 0.22 (20)  | 0.06 $\pm$ 0.04 (19)  |

Supplemental table S5. Male Lake Chub metrics (mean  $\pm$  SD(n)); \* denote significant difference at Lower site compared to Upper site ( $p < 0.05$ ).

| Site       | Date | Age (year)          | Length (cm)           | Weight (g)            | Gonad weight (g)      | Liver weight (g)      |
|------------|------|---------------------|-----------------------|-----------------------|-----------------------|-----------------------|
| Lower Ells | 2013 | 1.5 $\pm$ 0.7 (21)  | 72.0 $\pm$ 8.83 (21)  | 3.97 $\pm$ 1.68 (21)  | 0.03 $\pm$ 0.02 (21)  | 0.07 $\pm$ 0.03 (21)  |
|            | 2014 | 0.9 $\pm$ 0.6 (17)  | 80.6 $\pm$ 7.04 (20)* | 5.84 $\pm$ 1.57 (20)* | 0.05 $\pm$ 0.02 (20)* | 0.09 $\pm$ 0.06 (20)* |
|            | 2015 | 1.5 $\pm$ 0.8 (16)* | 73.1 $\pm$ 9.72 (16)  | 4.33 $\pm$ 1.68 (16)  | 0.04 $\pm$ 0.03 (16)  | 0.07 $\pm$ 0.03 (16)  |
|            | 2018 | 1.9 $\pm$ 0.8 (18)* | 65.2 $\pm$ 4.66 (20)  | 2.78 $\pm$ 0.66 (20)  | 0.02 $\pm$ 0.01 (20)* | 0.04 $\pm$ 0.01 (20)  |
| Upper Ells | 2013 | 1.7 $\pm$ 0.6 (11)  | 73.8 $\pm$ 11.8 (12)  | 4.15 $\pm$ 1.91 (12)  | 0.04 $\pm$ 0.02 (12)  | 0.05 $\pm$ 0.02 (12)  |
|            | 2014 | 1.1 $\pm$ 0.4 (20)  | 67.0 $\pm$ 6.37 (20)  | 3.06 $\pm$ 0.93 (20)  | 0.03 $\pm$ 0.02 (20)  | 0.04 $\pm$ 0.01 (20)  |
|            | 2015 | 2.5 $\pm$ 0.8 (20)  | 75.6 $\pm$ 5.21 (20)  | 4.50 $\pm$ 0.85 (20)  | 0.04 $\pm$ 0.01 (20)  | 0.07 $\pm$ 0.02 (20)  |
|            | 2018 | 1.7 $\pm$ 0.8 (17)  | 65.5 $\pm$ 8.72 (20)  | 2.85 $\pm$ 1.12 (20)  | 0.03 $\pm$ 0.01 (20)  | 0.04 $\pm$ 0.03 (20)  |

Supplemental table S6. p-values for OLS and GLM spatial comparisons (Lower Ells vs Upper Ells) of male and female lake chub collected in the Ells River in 2013-2015, and 2018; Int=intercept; yellow highlighting = slope with p-value <0.05; red highlighting = intercept with p-value <0.05; ES=effect size (%).

| Inferential<br>Statistic | Sex | Year | GW    |        |        | LW    |       |        | BW    |       |       |
|--------------------------|-----|------|-------|--------|--------|-------|-------|--------|-------|-------|-------|
|                          |     |      | Slope | Int.   | CES    | Slope | Int.  | CES    | Slope | Int   | CES   |
| OLS                      | F   | 2013 | 0.25  | 0.162  | 9.86   | 0.627 | 0.004 | 25.85  | 0.424 | 0.211 | 4.25  |
|                          | F   | 2014 | 0.897 | 0.045  | 6.45   | 0.235 | 0.485 | 12.53  | >0.99 | 0.026 | 11.31 |
|                          | F   | 2015 | 0.809 | 0.008  | -28.86 | 0.776 | 0.013 | -21.33 | 0.71  | 0.744 | -0.90 |
|                          | F   | 2018 | 0.04  | 0.086  | -27.10 | 0.487 | 0.202 | 5.75   | 0.535 | 0.091 | 0.76  |
|                          | M   | 2013 | 0.147 | 0.347  | -10.87 | 0.577 | 0.002 | 27.49  | 0.097 | 0.362 | 2.95  |
|                          | M   | 2014 | 0.13  | <0.001 | -9.77  | 0.041 | 0.866 | 11.02  | 0.510 | 0.028 | 9.71  |
|                          | M   | 2015 | 0.625 | 0.282  | -9.37  | 0.047 | 0.129 | 10.02  | 0.619 | 0.331 | 3.51  |
|                          | M   | 2018 | 0.218 | 0.002  | -35.22 | 0.233 | 0.162 | 14.13  | 0.931 | 0.22  | 2.80  |
| GLM                      | F   | 2013 | 0.355 | 0.138  | 9.86   | 0.789 | 0.005 | 25.85  | 0.893 | 0.058 | 4.25  |
|                          | F   | 2014 | 0.012 | 0.534  | 6.45   | 0.168 | 0.455 | 12.53  | 0.027 | 0.002 | 11.31 |
|                          | F   | 2015 | 0.217 | 0.005  | -28.86 | 0.24  | 0.003 | -21.33 | 0.884 | 0.988 | -0.90 |
|                          | F   | 2018 | 0.017 | 0.421  | -27.10 | 0.601 | 0.184 | 5.75   | 0.716 | 0.013 | 0.76  |
|                          | M   | 2013 | 0.202 | 0.502  | -10.87 | 0.728 | 0.005 | 27.49  | 0.06  | 0.283 | 2.95  |
|                          | M   | 2014 | 0.128 | <0.001 | -9.77  | 0.457 | 0.765 | 11.02  | 0.758 | 0.025 | 9.71  |
|                          | M   | 2015 | 0.899 | 0.203  | -9.37  | 0.038 | 0.382 | 10.02  | 0.552 | 0.721 | 3.51  |
|                          | M   | 2018 | 0.054 | 0.003  | -35.22 | 0.088 | 0.128 | 14.13  | 0.642 | 0.047 | 2.80  |

Supplemental table S7. p-values for OLS temporal comparisons of male and female lake chub collected in the Ells River in 2013-2015, and 2018; Int=intercept; yellow highlighting = slope with p-value <0.05; pink highlighting = intercept with p-value <0.05; ES=effect size (%).

| Sex | Site  | Ref Year | Test Year | GW     |        |        | LW    |        |        | BW    |       |       |
|-----|-------|----------|-----------|--------|--------|--------|-------|--------|--------|-------|-------|-------|
|     |       |          |           | Slope  | Int    | ES     | Slope | Int    | ES     | Slope | Int   | ES    |
| M   | lower | 2013     | 2014      | 0.303  | 0.077  | 0.89   | 0.122 | 0.021  | -12.68 | 0.995 | 0.08  | 7.61  |
| M   | lower | 2013     | 2015      | 0.455  | 0.588  | 3.19   | 0.964 | 0.307  | -6.56  | 0.161 | 0.064 | 5.27  |
| M   | lower | 2013     | 2018      | 0.009  | 0.533  | -19.67 | 0.168 | 0.012  | -16.89 | 0.741 | 0.545 | -2.83 |
| M   | lower | 2014     | 2015      | 0.979  | 0.163  | 2.28   | 0.162 | 0.124  | 7.01   | 0.308 | 0.411 | -2.18 |
| M   | lower | 2014     | 2018      | <0.001 | 0.996  | -20.37 | 0.049 | 0.831  | -4.82  | 0.794 | 0.134 | -9.70 |
| M   | lower | 2015     | 2018      | 0.006  | 0.968  | -22.15 | 0.221 | 0.081  | -11.05 | 0.154 | 0.004 | -7.69 |
| M   | upper | 2013     | 2014      | 0.069  | 0.464  | -0.35  | 0.511 | 0.621  | 0.27   | 0.437 | 0.802 | 0.98  |
| M   | upper | 2013     | 2015      | 0.074  | 0.876  | 1.48   | 0.02  | 0.297  | 8.28   | 0.801 | 0.035 | 4.69  |
| M   | upper | 2013     | 2018      | 0.482  | 0.824  | 10.53  | 0.514 | 0.385  | -7.16  | 0.03  | 0.404 | -2.69 |
| M   | upper | 2014     | 2015      | 0.742  | 0.014  | 1.83   | 0.005 | 0.326  | 7.99   | 0.349 | 0.024 | 3.68  |
| M   | upper | 2014     | 2018      | 0.013  | 0.549  | 10.92  | 0.308 | 0.179  | -7.41  | 0.184 | 0.114 | -3.63 |
| M   | upper | 2015     | 2018      | 0.026  | 0.987  | 8.92   | 0.467 | 0.324  | -14.26 | 0.046 | 0.029 | -7.05 |
| F   | lower | 2013     | 2014      | 0.804  | <0.001 | -30.49 | 0.013 | 0.002  | -18.71 | 0.953 | 0.27  | 3.83  |
| F   | lower | 2013     | 2015      | 0.937  | <0.001 | -28.90 | 0.342 | 0.045  | -12.00 | 0.434 | 0.757 | 1.42  |
| F   | lower | 2013     | 2018      | 0.104  | <0.001 | -48.67 | 0.409 | <0.001 | -31.38 | 0.428 | 0.105 | -5.69 |
| F   | lower | 2014     | 2015      | 0.769  | 0.327  | 2.29   | 0.054 | 0.062  | 8.25   | 0.378 | 0.419 | -2.33 |
| F   | lower | 2014     | 2018      | 0.205  | 0.274  | -26.15 | 0.219 | 0.959  | -15.58 | 0.355 | 0.016 | -9.18 |
| F   | lower | 2015     | 2018      | 0.115  | 0.655  | -27.81 | 0.844 | 0.022  | -22.02 | 0.942 | 0.056 | -7.01 |
| F   | upper | 2013     | 2014      | 0.444  | 0.832  | -28.26 | 0.907 | 0.409  | -9.08  | 0.482 | 0.652 | -2.75 |
| F   | upper | 2013     | 2015      | 0.26   | 0.996  | 9.80   | 0.534 | 0.003  | 40.77  | 0.765 | 0.142 | 6.69  |
| F   | upper | 2013     | 2018      | 0.078  | 0.138  | -22.65 | 0.085 | 0.042  | -18.34 | 0.544 | 0.84  | -2.42 |
| F   | upper | 2014     | 2015      | 0.983  | 0.108  | 53.07  | 0.687 | 0.099  | 54.83  | 0.418 | 0.573 | 9.71  |
| F   | upper | 2014     | 2018      | 0.877  | <0.001 | 7.83   | 0.417 | 0.073  | -10.18 | 0.228 | 0.111 | 0.34  |
| F   | upper | 2015     | 2018      | 0.785  | 0.293  | -29.55 | 0.533 | <0.001 | -41.99 | 0.947 | 0.077 | -8.54 |

Supplemental table S8. p-values for GLM temporal comparisons of male and female lake chub collected in the Ells River in 2013-2015, and 2018; Int=intercept; yellow highlighting = slope with p-value <0.05; pink highlighting = intercept with p-value <0.05; ES=effect size (%).

| Sex | Site  | Ref Year | Test Year | GW    |       |        | LW    |        |        | BW     |       |       |
|-----|-------|----------|-----------|-------|-------|--------|-------|--------|--------|--------|-------|-------|
|     |       |          |           | Slope | Int   | ES     | Slope | Int    | ES     | Slope  | Int   | ES    |
| M   | lower | 2013     | 2014      | 0.661 | 0.128 | 0.89   | 0.215 | 0.09   | -12.68 | 0.744  | 0.052 | 7.61  |
|     |       | 2013     | 2015      | 0.606 | 0.814 | 3.19   | 0.867 | 0.506  | -6.56  | 0.215  | 0.087 | 5.27  |
|     |       | 2013     | 2018      | 0.069 | 0.226 | -19.67 | 0.697 | 0.005  | -16.89 | 0.131  | 0.465 | -2.83 |
|     |       | 2014     | 2015      | 0.842 | 0.095 | 2.28   | 0.312 | 0.219  | 7.01   | 0.531  | 0.288 | -2.18 |
|     |       | 2014     | 2018      | 0.009 | 0.946 | -20.37 | 0.357 | 0.631  | -4.82  | 0.142  | 0.125 | -9.70 |
|     |       | 2015     | 2018      | 0.031 | 0.527 | -22.15 | 0.64  | 0.058  | -11.05 | 0.018  | 0.008 | -7.69 |
|     | upper | 2013     | 2014      | 0.005 | 0.773 | -0.35  | 0.596 | 0.704  | 0.27   | 0.076  | 0.892 | 0.98  |
|     |       | 2013     | 2015      | 0.053 | 0.638 | 1.48   | 0.007 | 0.053  | 8.28   | 0.959  | 0.008 | 4.69  |
|     |       | 2013     | 2018      | 0.262 | 0.87  | 10.53  | 0.022 | 0.722  | -7.16  | <0.001 | 0.574 | -2.69 |
|     |       | 2014     | 2015      | 0.301 | 0.034 | 1.83   | 0.056 | 0.357  | 7.99   | 0.108  | 0.016 | 3.68  |
|     |       | 2014     | 2018      | 0.096 | 0.515 | 10.92  | 0.066 | 0.293  | -7.41  | 0.009  | 0.053 | -3.63 |
|     |       | 2015     | 2018      | 0.426 | 0.339 | 8.92   | 0.401 | 0.967  | -14.26 | <0.001 | 0.103 | -7.05 |
| F   | lower | 2013     | 2014      | 0.407 | 0.005 | -30.49 | 0.336 | 0.064  | -18.71 | 0.147  | 0.167 | 3.83  |
|     |       | 2013     | 2015      | 0.501 | 0.004 | -28.90 | 0.723 | 0.141  | -12.00 | 0.589  | 0.662 | 1.42  |
|     |       | 2013     | 2018      | 0.033 | 0.002 | -48.67 | 0.027 | <0.001 | -31.38 | 0.321  | 0.13  | -5.69 |
|     |       | 2014     | 2015      | 0.721 | 0.818 | 2.29   | 0.426 | 0.407  | 8.25   | 0.221  | 0.235 | -2.33 |
|     |       | 2014     | 2018      | 0.002 | 0.949 | -26.15 | 0.207 | 0.427  | -15.58 | 0.01   | 0.006 | -9.18 |
|     |       | 2015     | 2018      | 0.001 | 0.676 | -27.81 | 0.025 | 0.014  | -22.02 | 0.057  | 0.036 | -7.01 |
|     | upper | 2013     | 2014      | 0.006 | 0.499 | -28.26 | 0.114 | 0.474  | -9.08  | 0.238  | 0.714 | -2.75 |
|     |       | 2013     | 2015      | 0.52  | 0.251 | 9.80   | 0.333 | 0.001  | 40.77  | 0.66   | 0.024 | 6.69  |
|     |       | 2013     | 2018      | 0.069 | 0.587 | -22.65 | 0.093 | 0.362  | -18.34 | 0.075  | 0.583 | -2.42 |
|     |       | 2014     | 2015      | 0.001 | 0.038 | 53.07  | 0.062 | 0.001  | 54.83  | 0.109  | 0.122 | 9.71  |
|     |       | 2014     | 2018      | 0.041 | 0.116 | 7.83   | 0.32  | 0.178  | -10.18 | 0.596  | 0.037 | 0.34  |
|     |       | 2015     | 2018      | 0.009 | 0.1   | -29.55 | 0.014 | <0.001 | -41.99 | 0.027  | 0.05  | -8.54 |

Supplemental table S9. GLM p-values for grouped Reference years (2013-2015) compared to 2018; yellow highlighting = slope with p-value <0.05; pink highlighting = intercept with p-value <0.05; ES=effect size (%).

| Sex | Site  | Ref. Year | Test Year | GW    |       |        | LW    |        |        | BW     |       |       |
|-----|-------|-----------|-----------|-------|-------|--------|-------|--------|--------|--------|-------|-------|
|     |       |           |           | Slope | Int.  | ES     | Slope | Int    | ES     | Slope  | Int   | ES    |
| M   | Lower | 2013-2015 | 2018      | 0.043 | 0.421 | -20.62 | 0.669 | 0.042  | -11.31 | 0.128  | 0.02  | -6.70 |
|     | Upper | 2013-2015 | 2018      | 0.992 | 0.459 | 10.05  | 0.007 | 0.149  | -10.11 | <0.001 | 0.013 | -4.77 |
| F   | Lower | 2013-2015 | 2018      | 0.001 | 0.024 | -35.86 | 0.011 | <0.001 | -23.43 | 0.115  | 0.006 | -7.35 |
|     | Upper | 2013-2015 | 2018      | 0.087 | 0.253 | -17.49 | 0.562 | 0.01   | -27.39 | 0.147  | 0.229 | -4.04 |

## Supplemental Figures

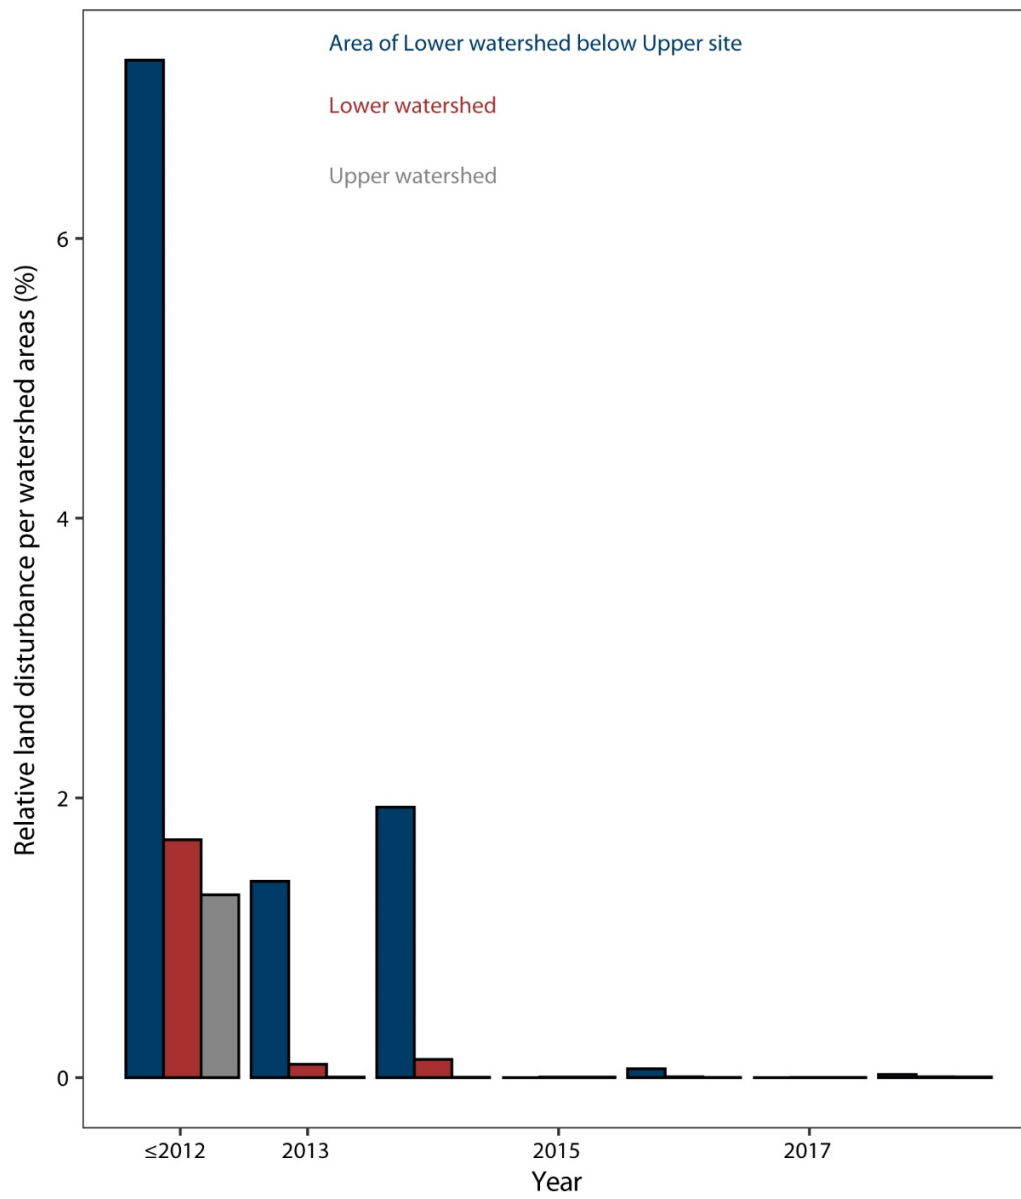

Supplemental Figure S1. Relative land disturbance (%) in watershed above Upper site (grey), above the Lower site (red) and area of lower watershed below the Upper location (blue) over time.

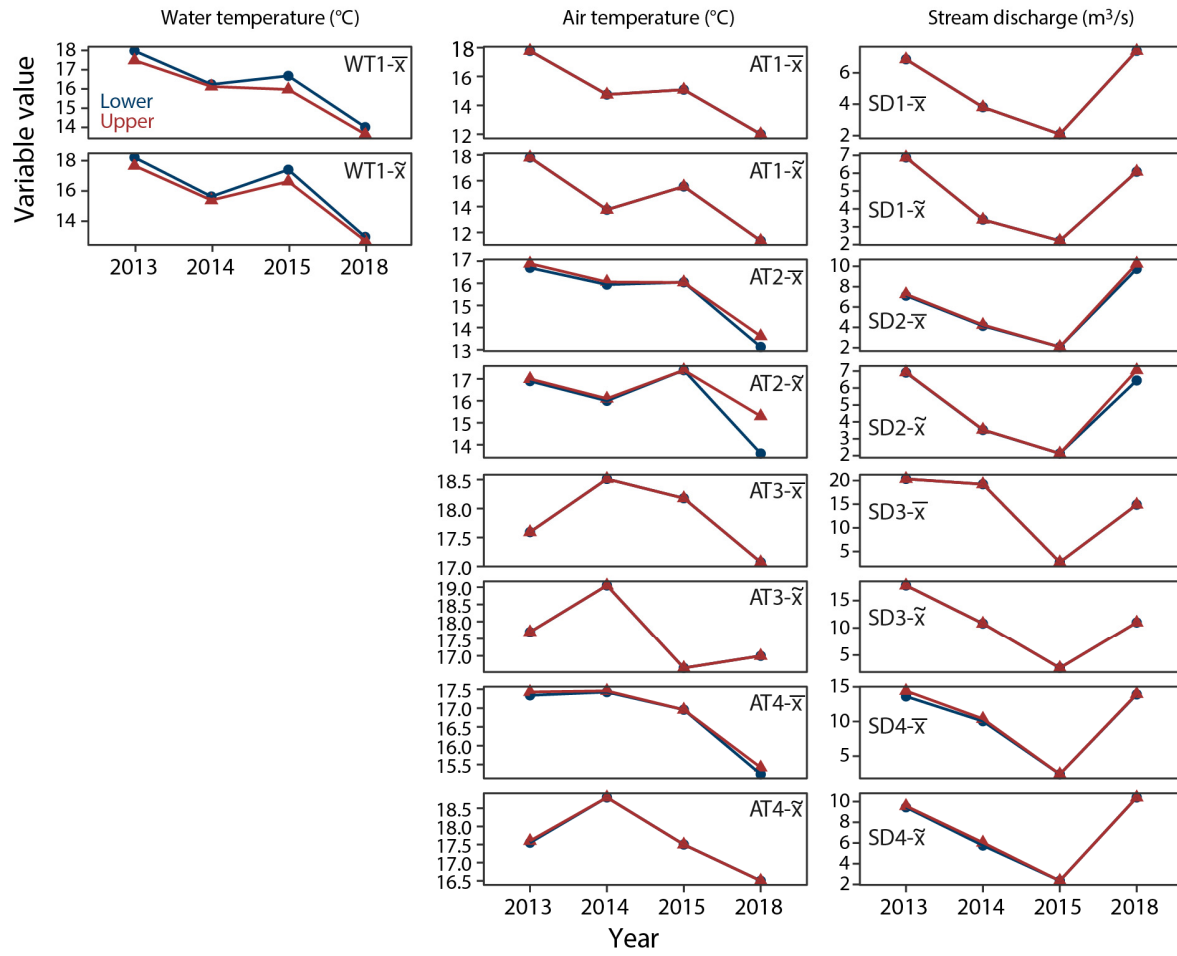

Supplemental Figure S2. Plots of environmental covariates for the Upper and Lower Ells locations; SD values are from the Upper Location; WT=water temperature; AT=air temperature; SD=stream discharge.

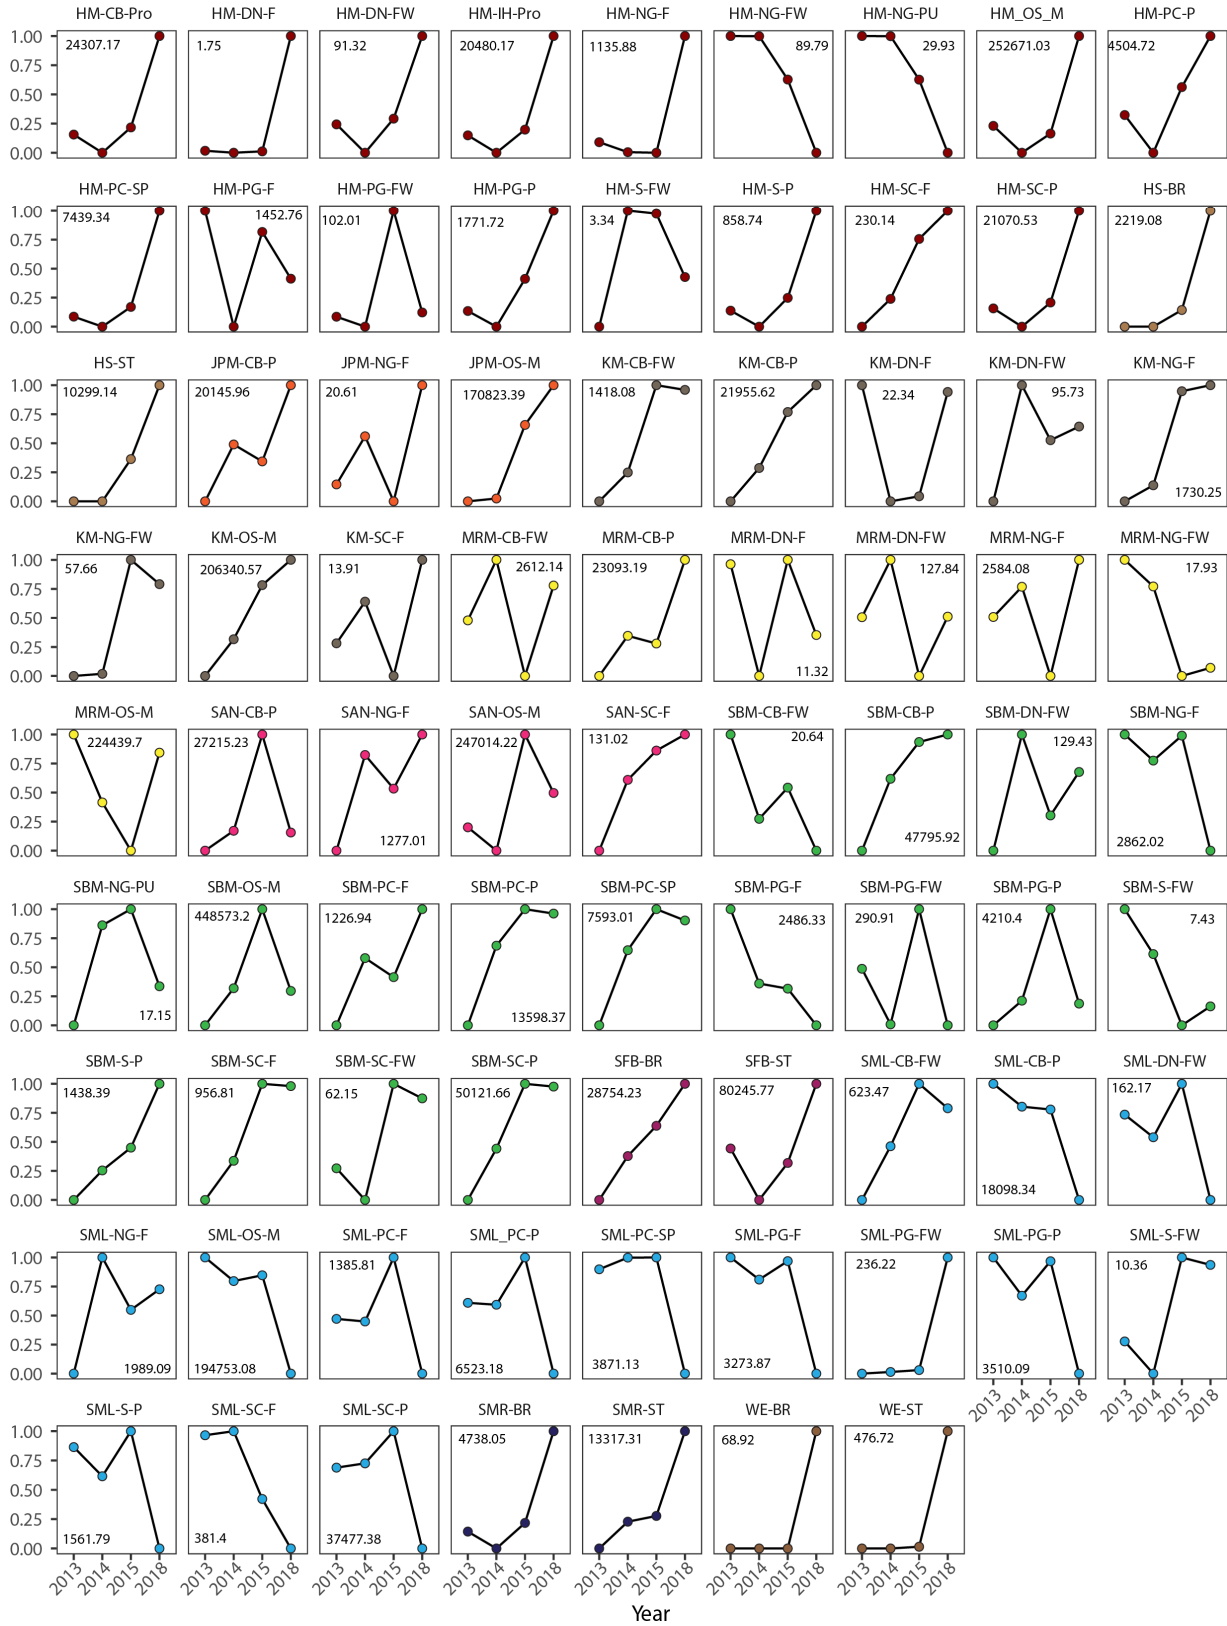

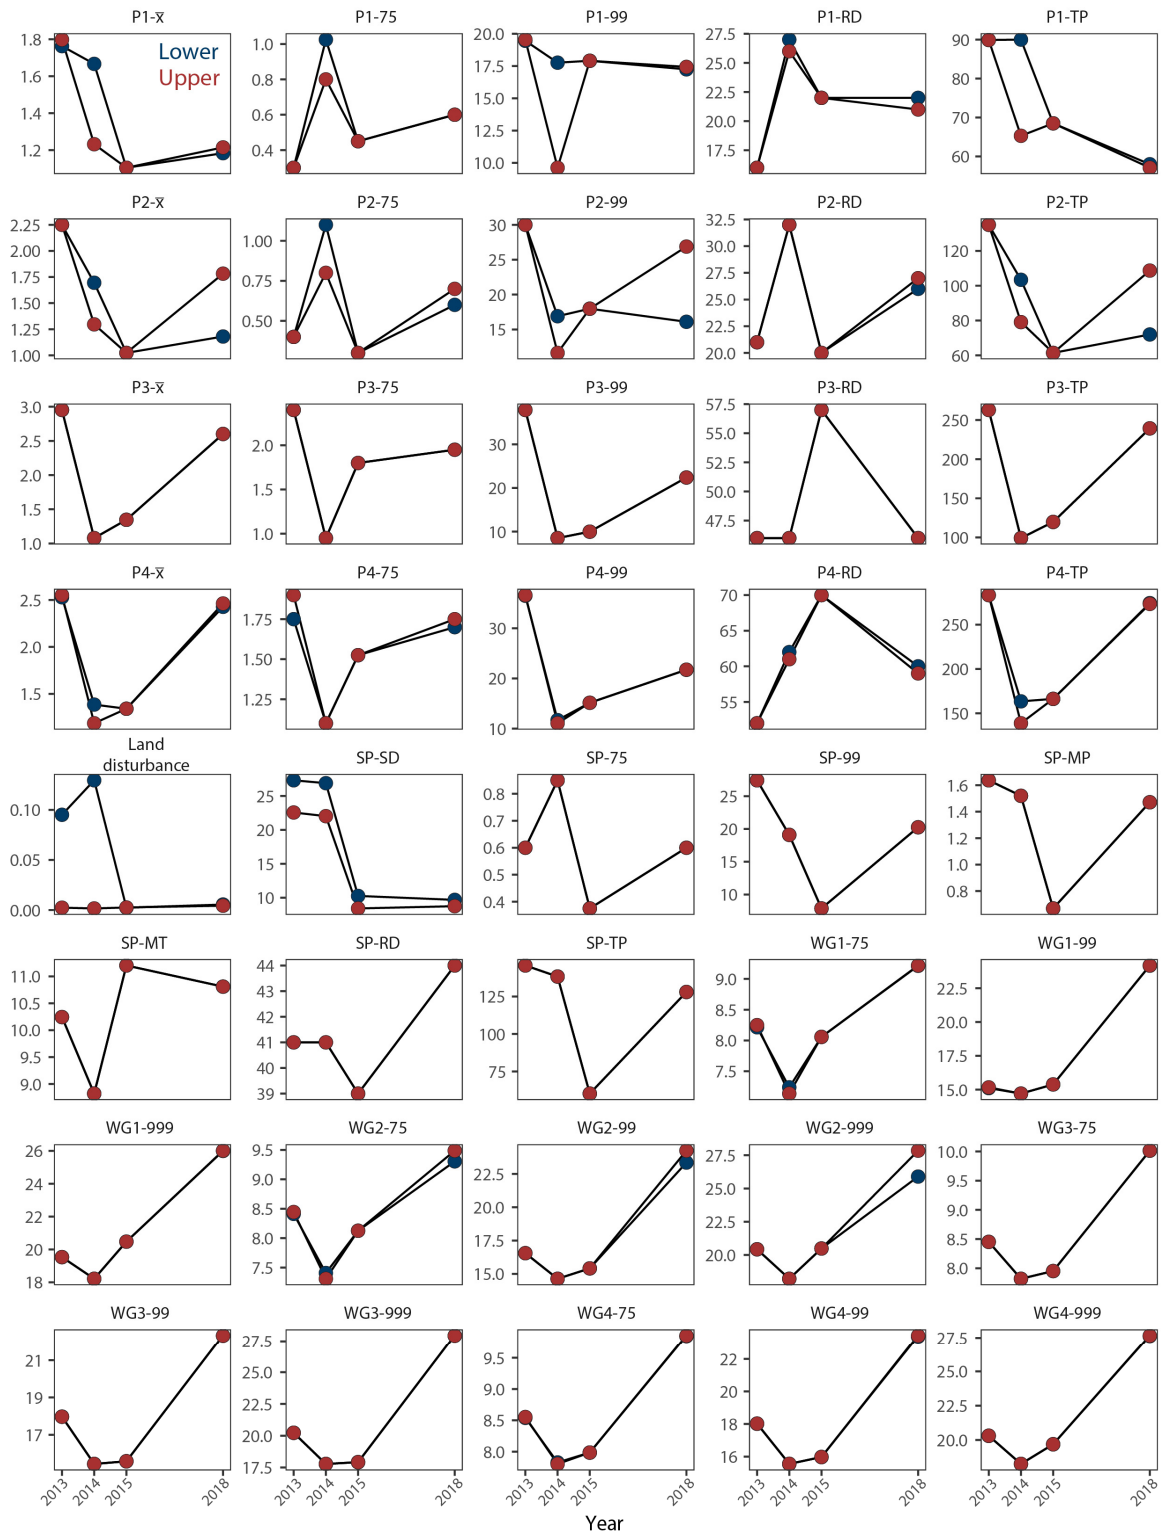

Supplemental Figure S4. Extra covariates included in ENV+IND models (and land disturbance) which may capture some industrial influence.

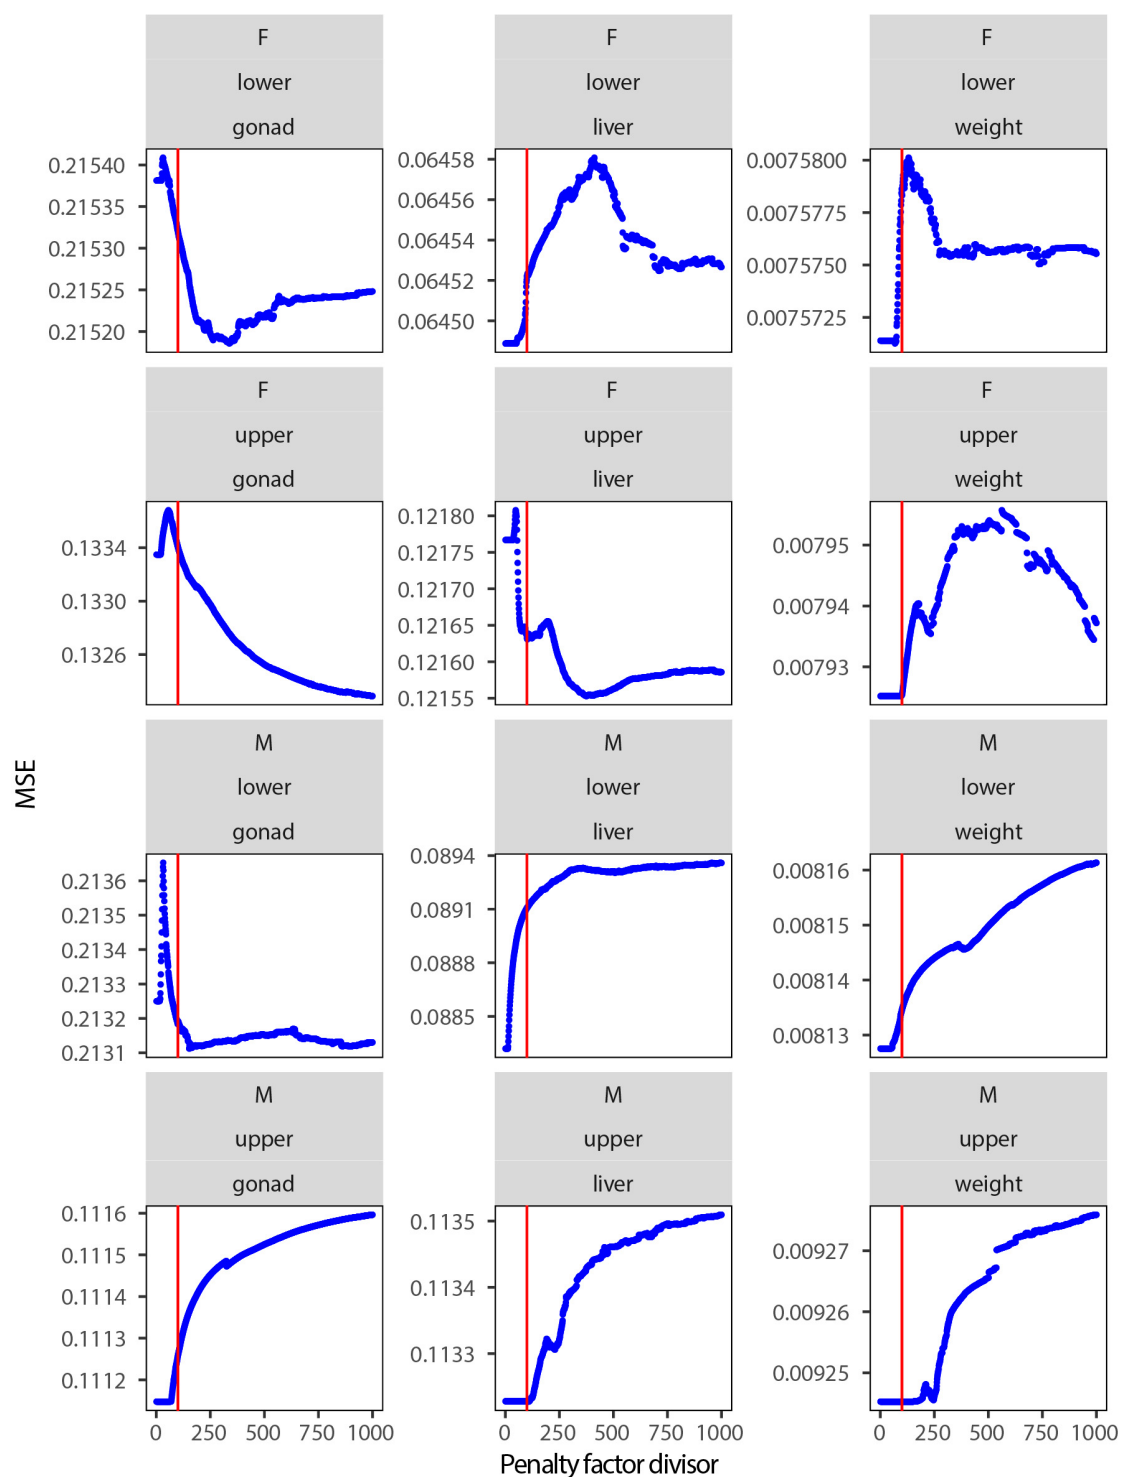

Supplemental Figure S5. Mean squared error for 1,000 Elastic net model runs using penalty factors based on distance in km divided by 1 to 1,000 of Upper and Lower sites to industrial facilities.

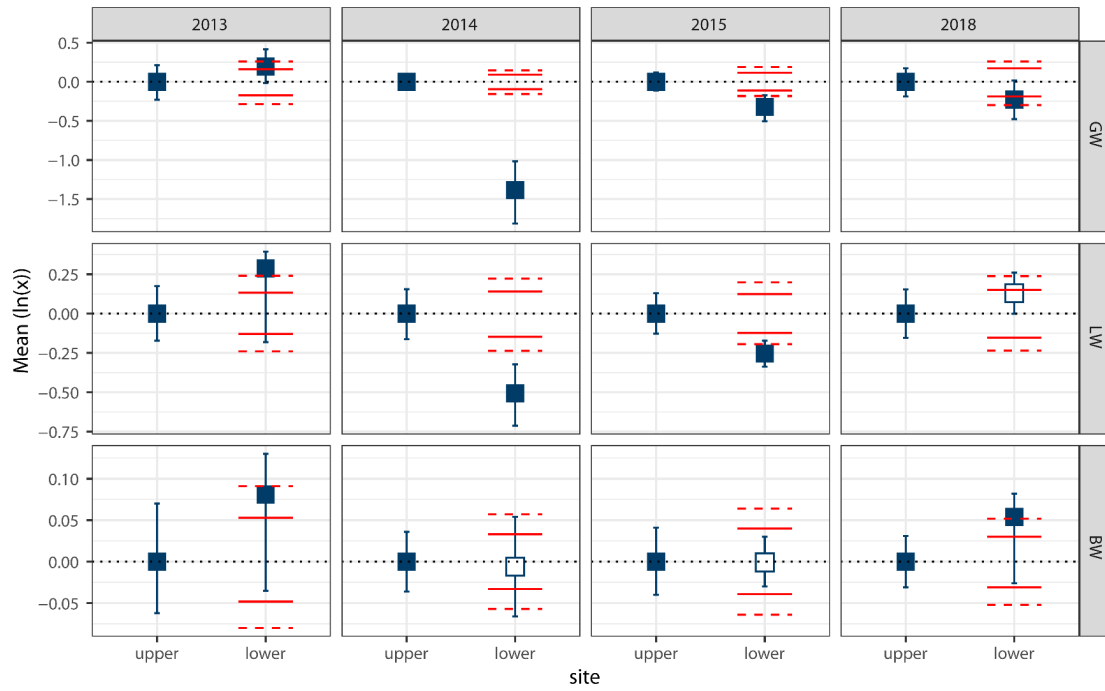

Supplemental Figure S6. Mean residual gonad weight (GW), liver weight (LW), and body weight (BW) of females (with central 95% confidence interval) at the upper and Lower Ells locations; residual GW, LW, and BW at the Lower site calculated using models estimated using fish from the Upper location; Redlines showing expected range of mean residuals at the Lower site given the sample size for the Lower site.

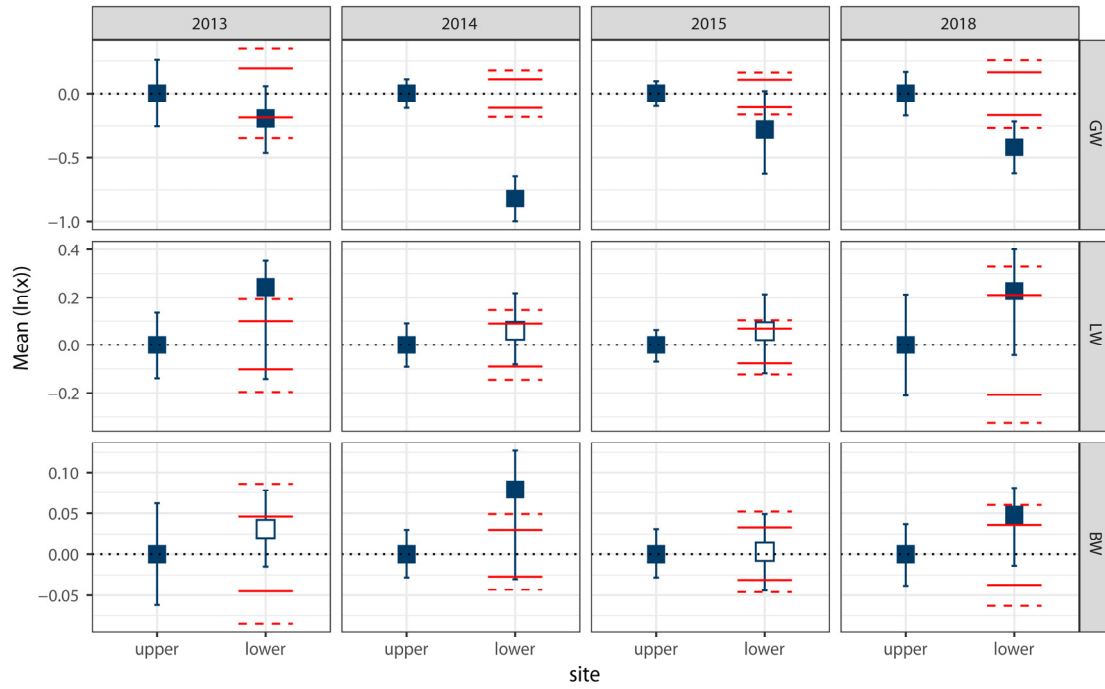

Supplemental Figure S7. Mean residual gonad weight (GW), liver weight (LW), and body weight (BW) of males (with central 95% confidence interval) at the Upper and Lower Ells locations; residual GW, LW, and BW at the Lower site calculated using models estimated using fish from the Upper location; Redlines showing expected range of mean residuals at the Lower site given the sample size for the Lower site.

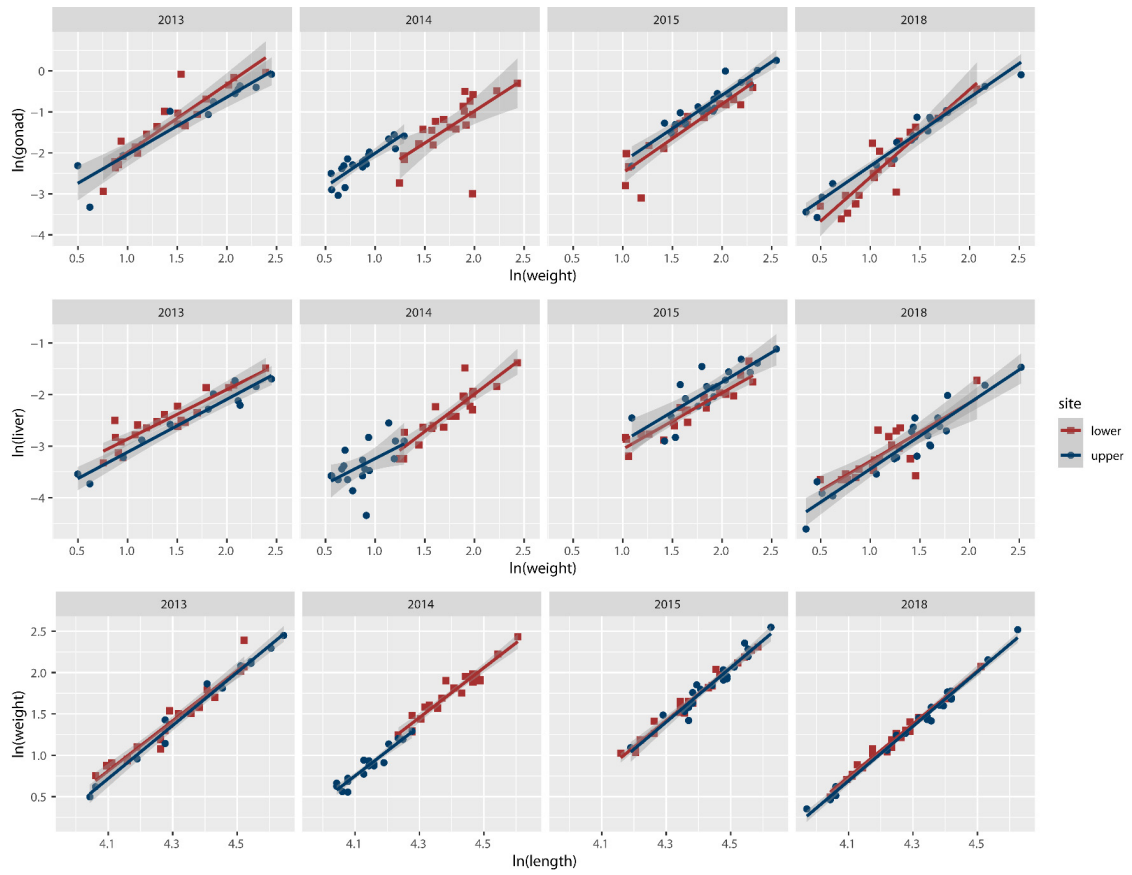

Supplemental Figure S8. Gonad weight, liver weight, and body weight of female lake chub relative to anatomical covariates at the Lower and Upper Ells locations in 2013:2015, 2018.

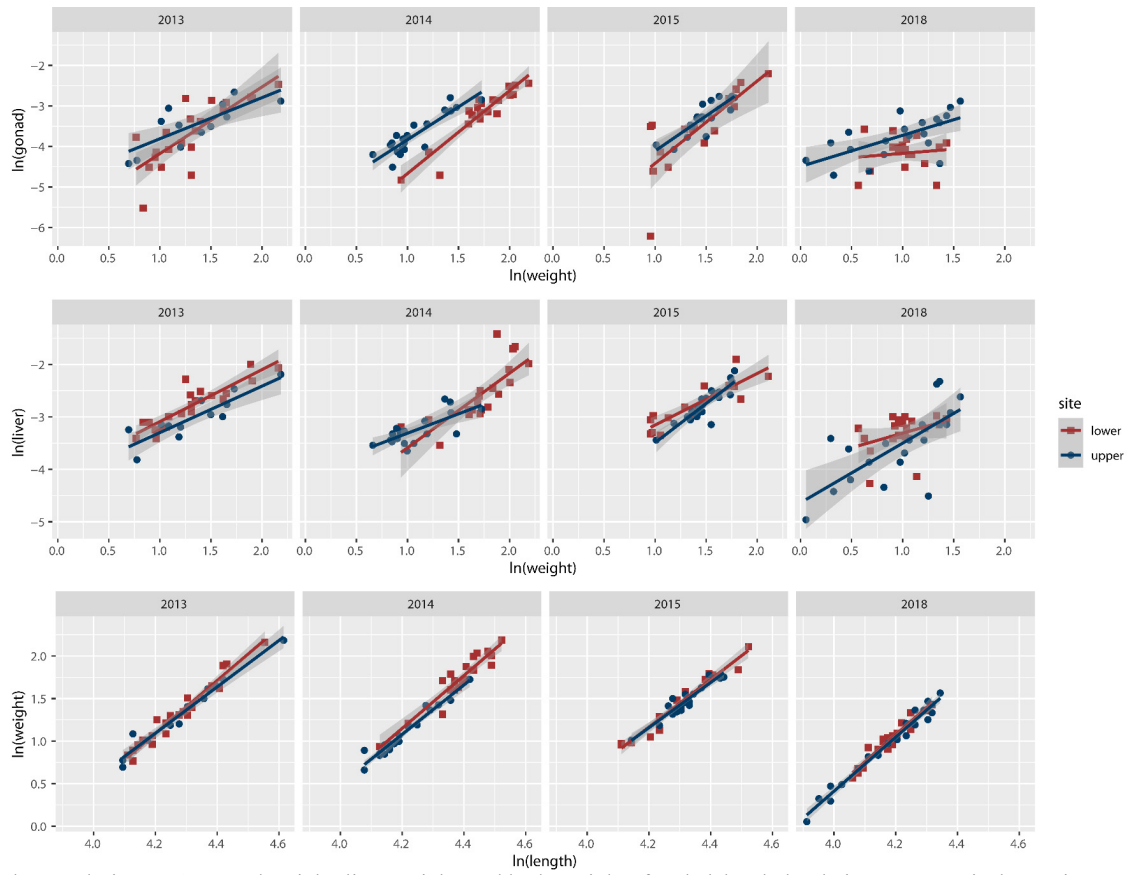

Supplemental Figure S9. Gonad weight, liver weight, and body weight of male lake chub relative to anatomical covariates at the lower and upper Ells locations by year 2013:2015, 2018.

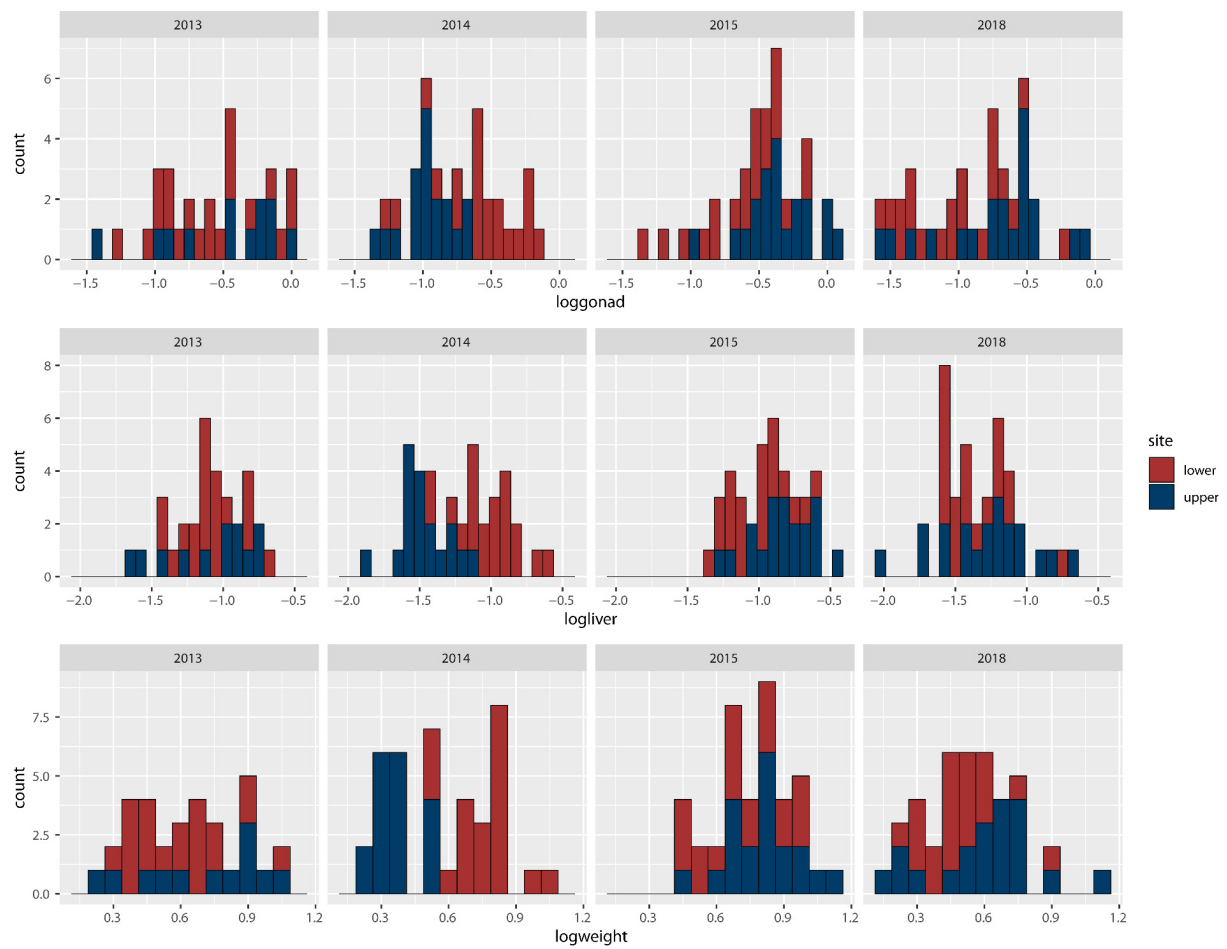

Supplemental Figure S10. Histograms of female lake chub gonad weight, liver weight, and body weight.

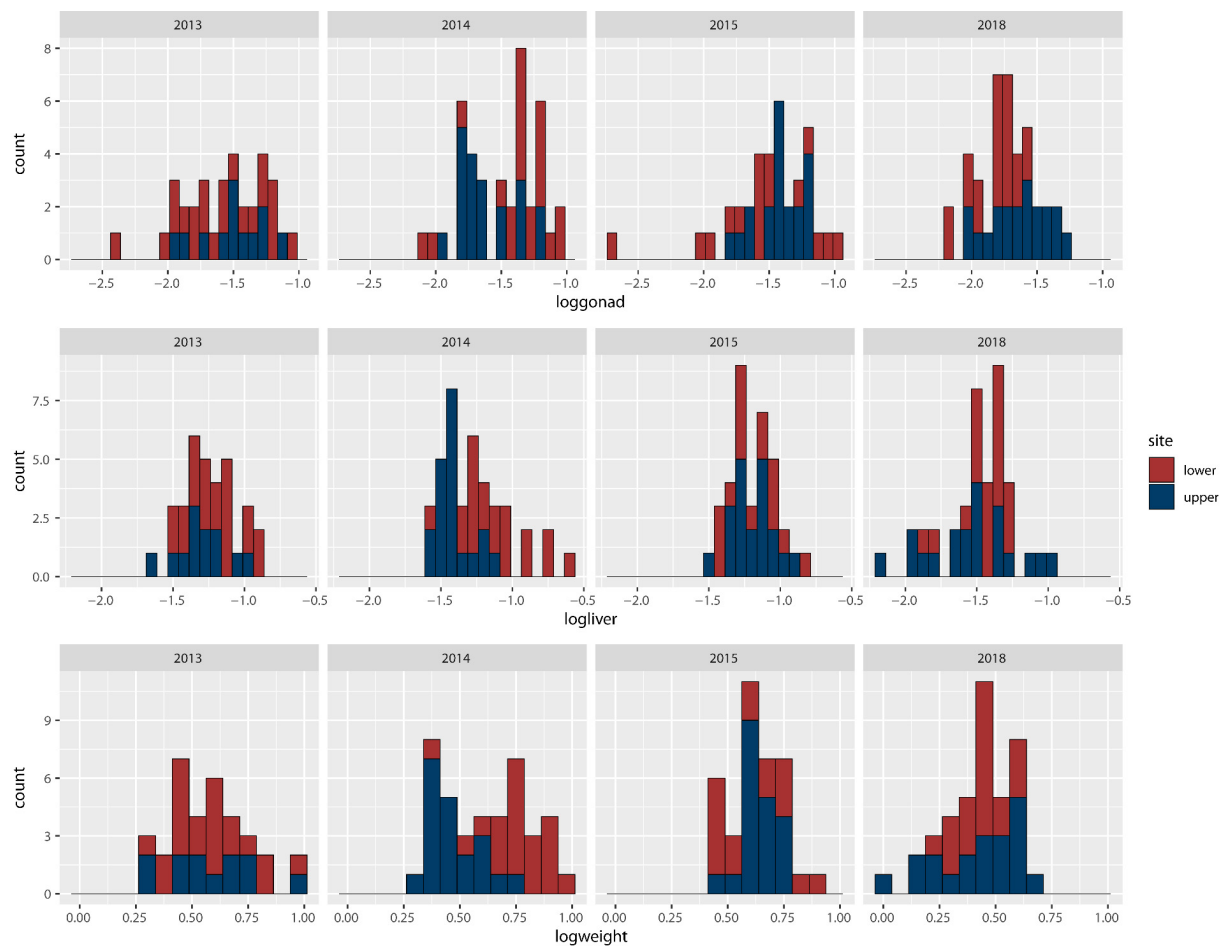

Supplemental Figure S11. Histograms of male lake chub gonad weight, liver weight, and body weight.

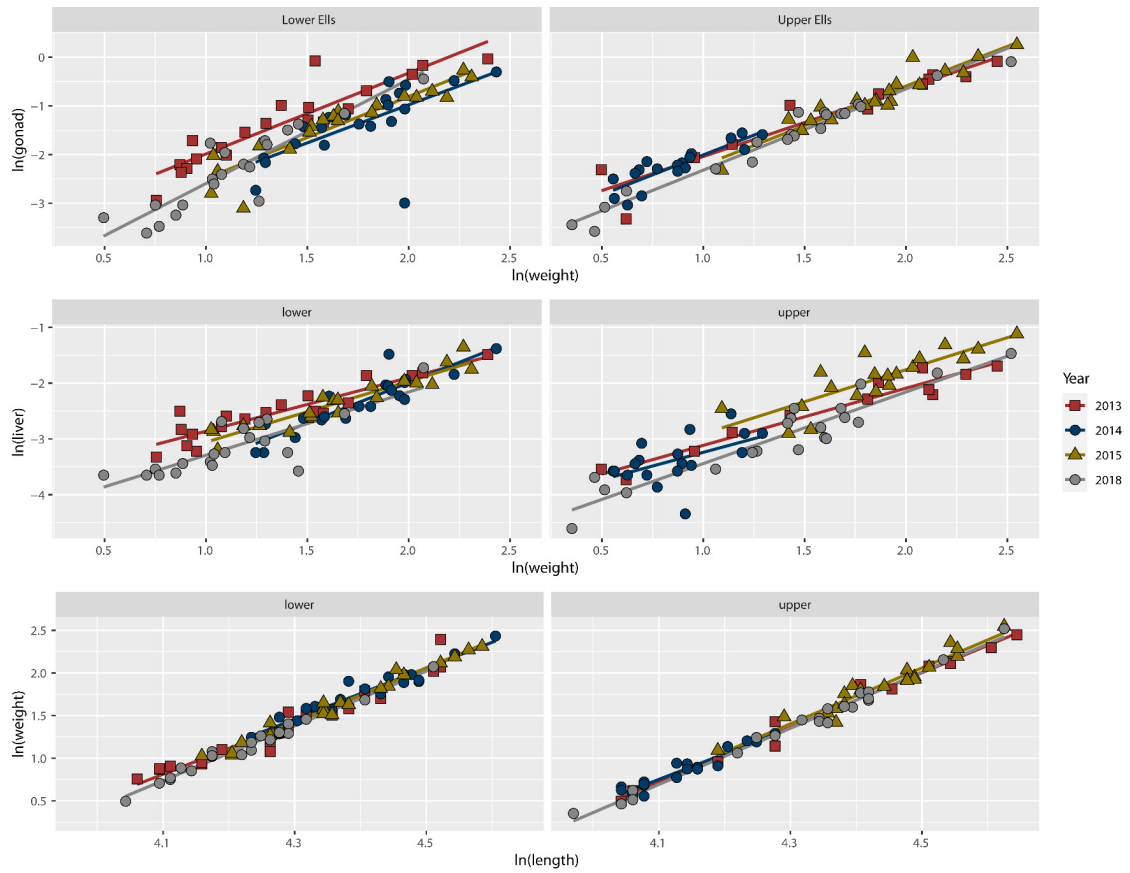

Supplemental Figure S12. Gonad weight, liver weight, and body weight of female lake chub relative to anatomical covariates in 2013, 2014, 2015, and 2018 by location (lower and upper Ells).

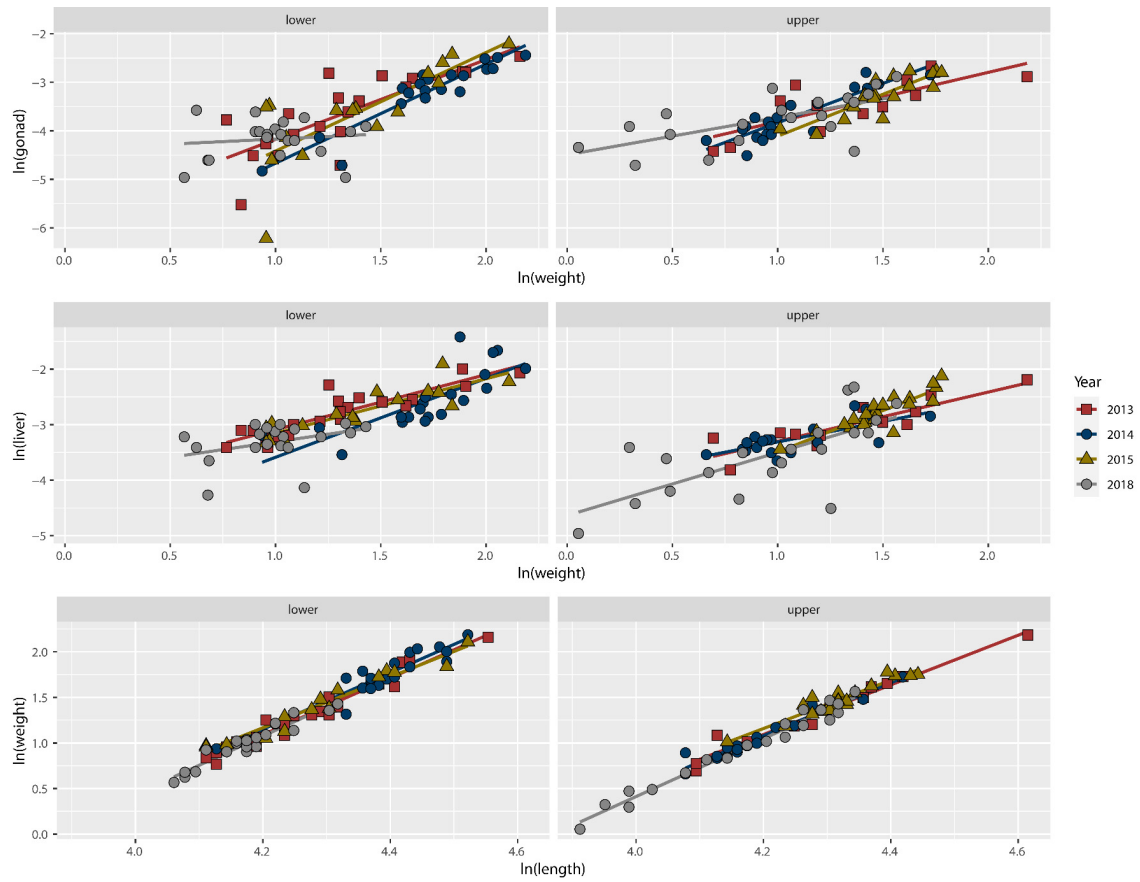

Supplemental Figure S13. Gonad weight, liver weight, and body weight of male lake chub relative to anatomical covariates in 2013, 2014, 2015, and 2018 by location (lower and upper Ells).

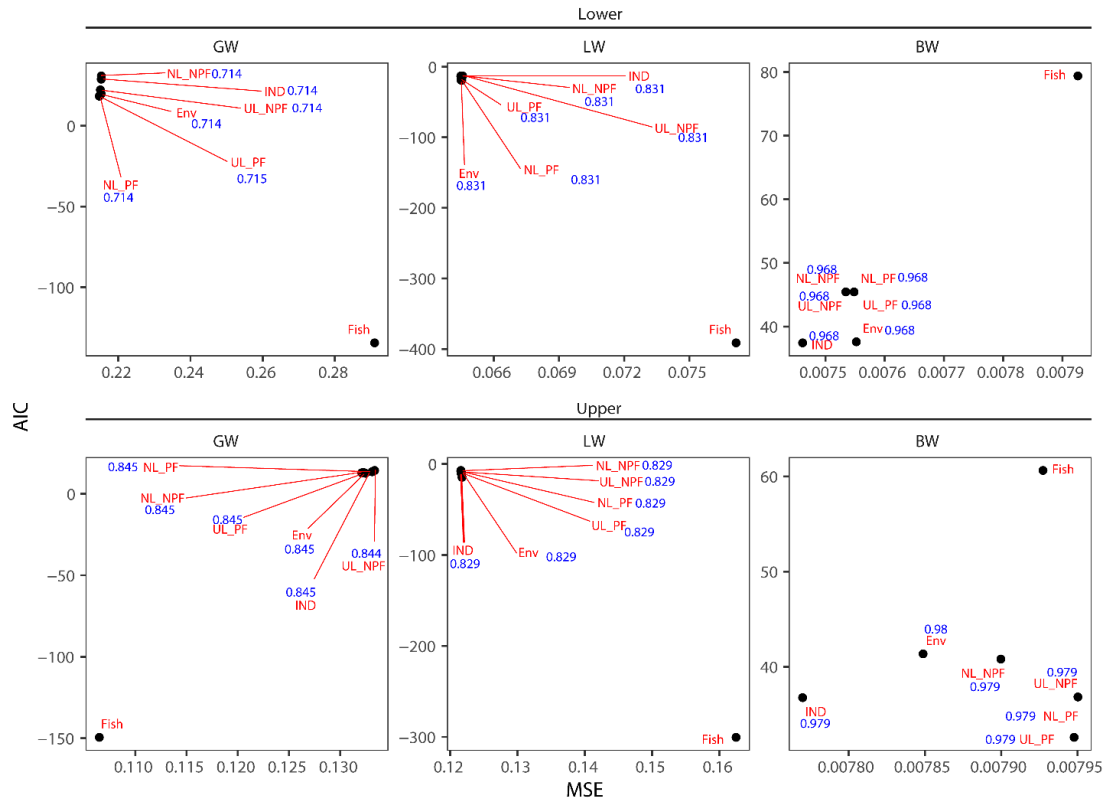

Supplemental Figure S14. Female model stats with FISH GLM results; AIC=Akaike's Information Criterion; MSE=Mean Squared Error; blue values denote Deviance Ratios of regularized regression models; 'Fish' =models with no environmental or industrial covariates; 'ENV' includes environmental covariates only; IND includes industrial covariates only (with no limits and no penalty factors); ENV+IND with no limits and no penalty factors (NL\_NPF); ENV+IND with no limits and penalty factors (NL\_PF); ENV+IND with upper limits and no penalty factors (UL\_NPF); ENV+IND with upper limits and penalty factors (UL\_PF).

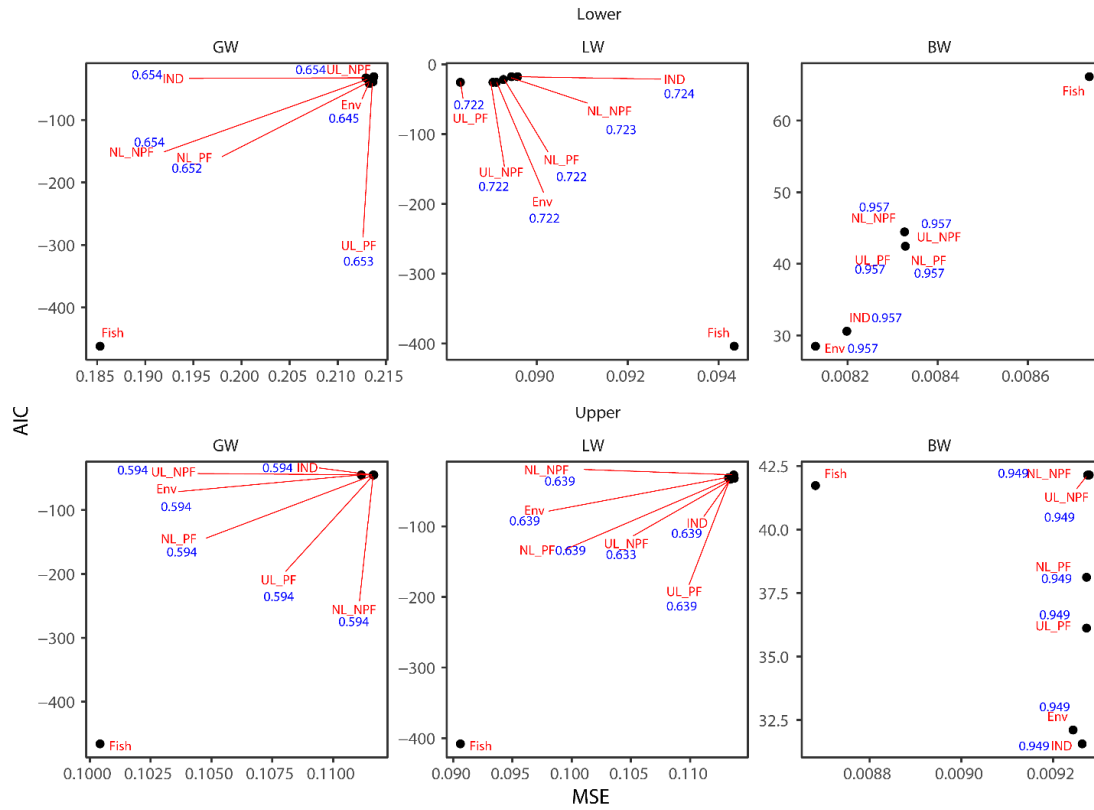

Supplemental Figure S15. Male model stats with FISH GLM results; AIC=Akaike's Information Criterion; MSE=Mean Squared Error; blue values denote Deviance Ratios of regularized regression models; 'Fish' =models with no environmental or industrial covariates; 'ENV' includes environmental covariates only; IND includes industrial covariates only (with no limits and no penalty factors); ENV+IND with no limits and no penalty factors (NL\_NPF); ENV+IND with no limits and penalty factors (NL\_PF); ENV+IND with upper limits and no penalty factors (UL\_NPF); ENV+IND with upper limits and penalty factors (UL\_PF).

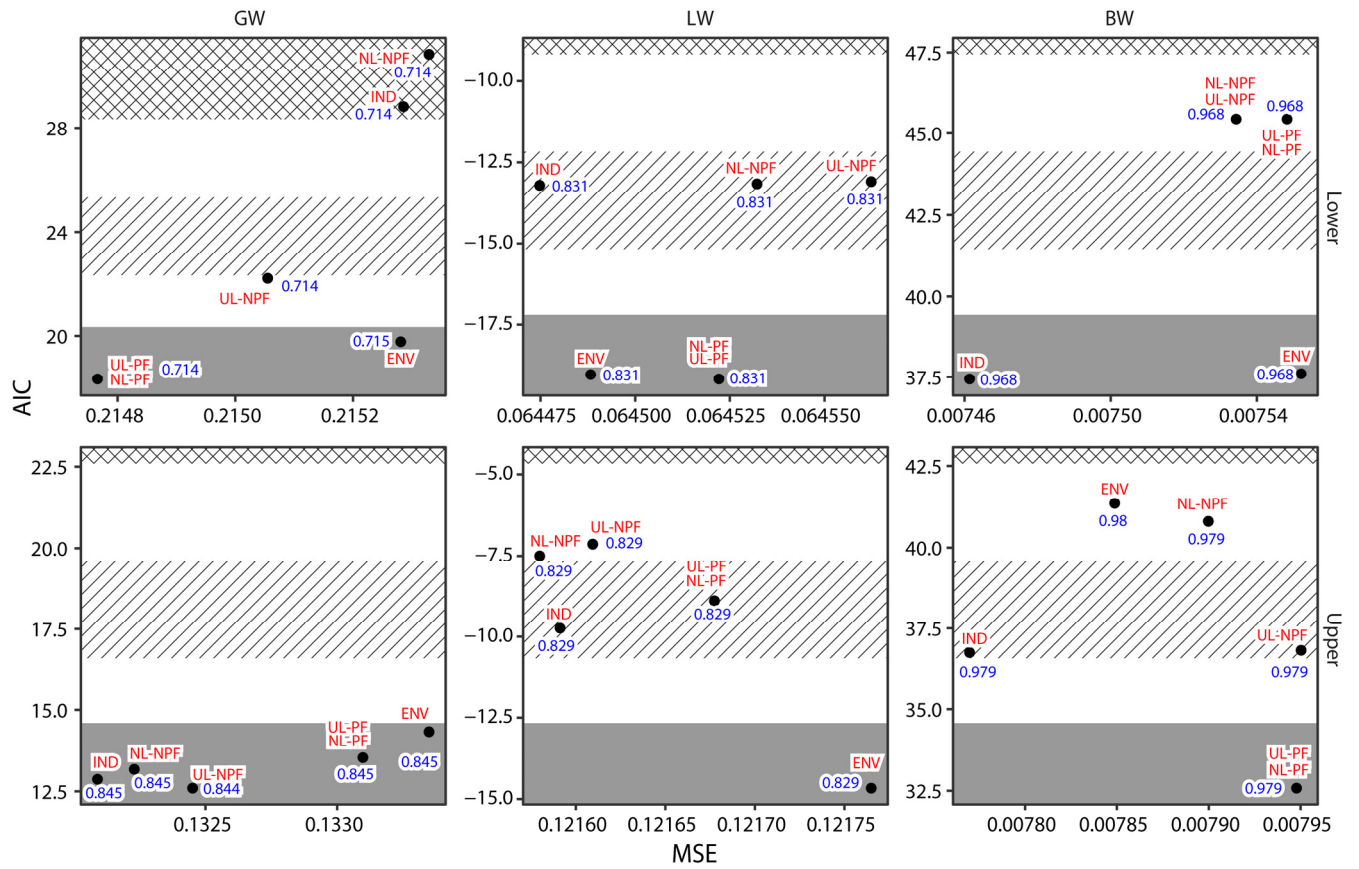

Supplemental Figure S16. AICs, MSEs, and Deviance ratios for model scenarios among female lake chub at the upper and lower locations; AIC=Akaike's Information Criterion; MSE=Mean Squared Error; blue values denote Deviance Ratios of regularized regression models; 'Fish' =models with no environmental or industrial covariates; 'ENV' includes environmental covariates only; IND includes industrial covariates only (with no limits and no penalty factors); ENV+IND with no limits and no penalty factors (NL-NPF); ENV+IND with no limits and penalty factors (NL-PF); ENV+IND with upper limits and no penalty factors (UL-NPF); ENV+IND with upper limits and penalty factors (UL-PF).

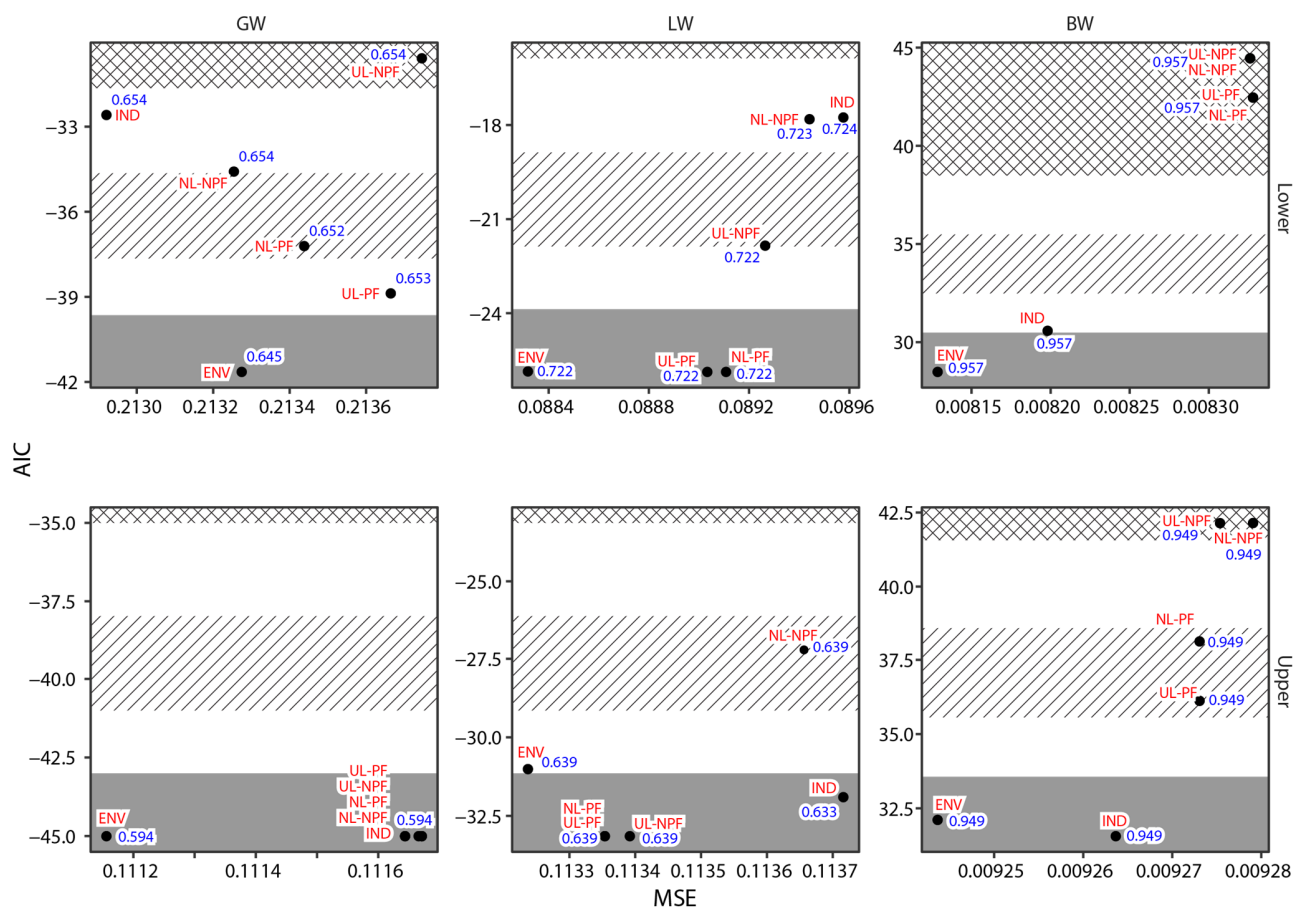

Supplemental Figure S17. AICs, MSEs, and Deviance ratios for model scenarios among male lake chub at the upper and lower locations; AIC=Akaike's Information Criterion; MSE=Mean Squared Error; blue values denote Deviance Ratios of regularized regression models; 'Fish' =models with no environmental or industrial covariates; 'ENV' includes environmental covariates only; IND includes industrial covariates only (with no limits and no penalty factors); ENV+IND with no limits and no penalty factors (NL-NPF); ENV+IND with no limits and penalty factors (NL-PF); ENV+IND with upper limits and no penalty factors (UL-NPF); ENV+IND with upper limits and penalty factors (UL-PF).

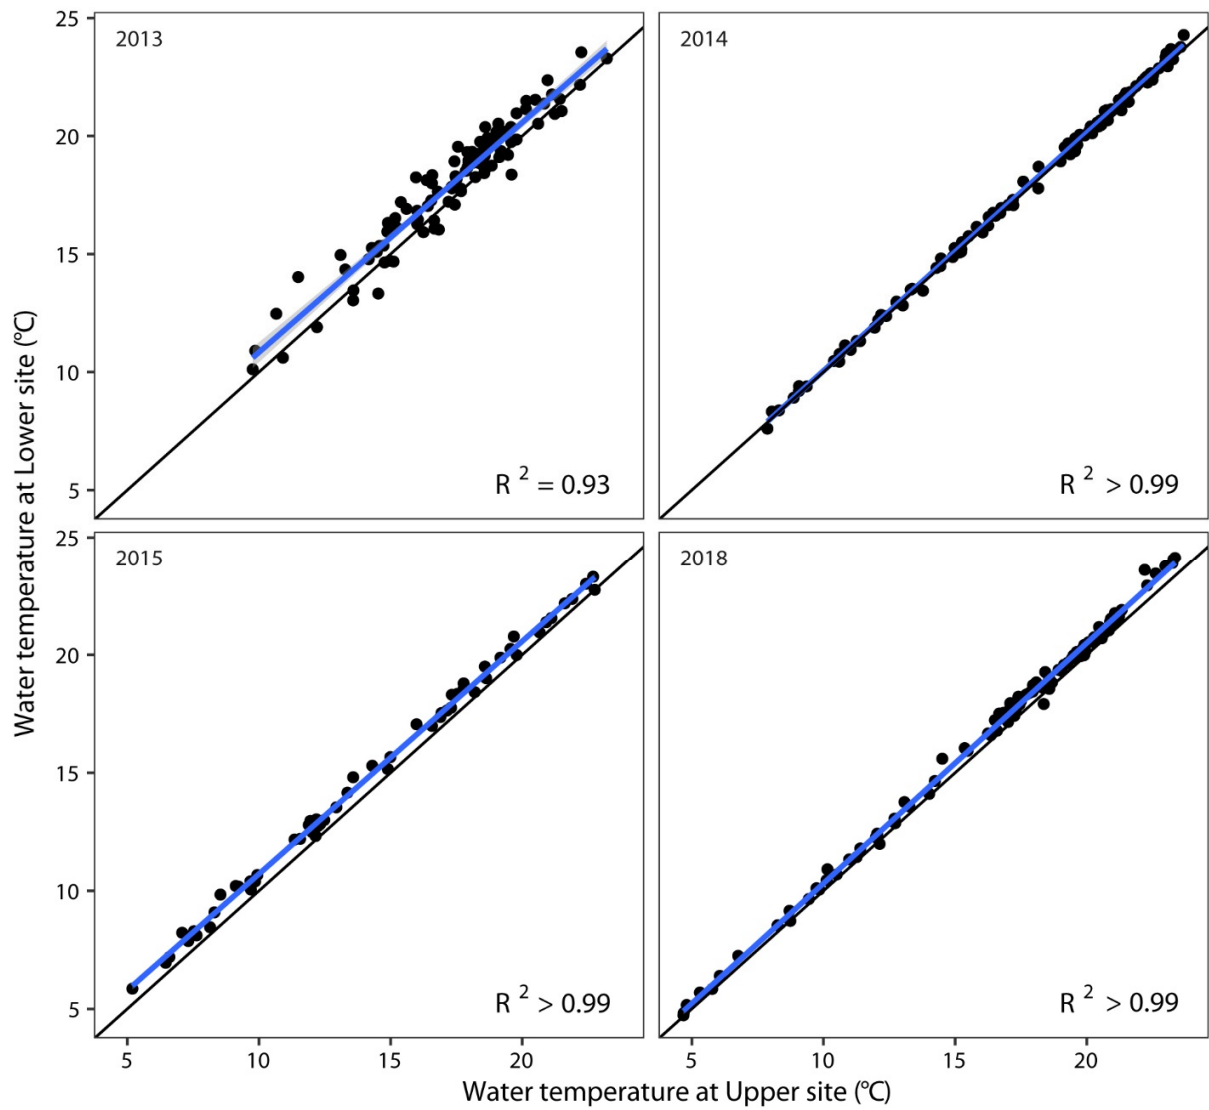

Supplemental Figure S18. Mean water temperature per day in 2013-2015 and 2018 at the Upper and Lower Ells fishing locations; diagonal black line is 1:1 line.

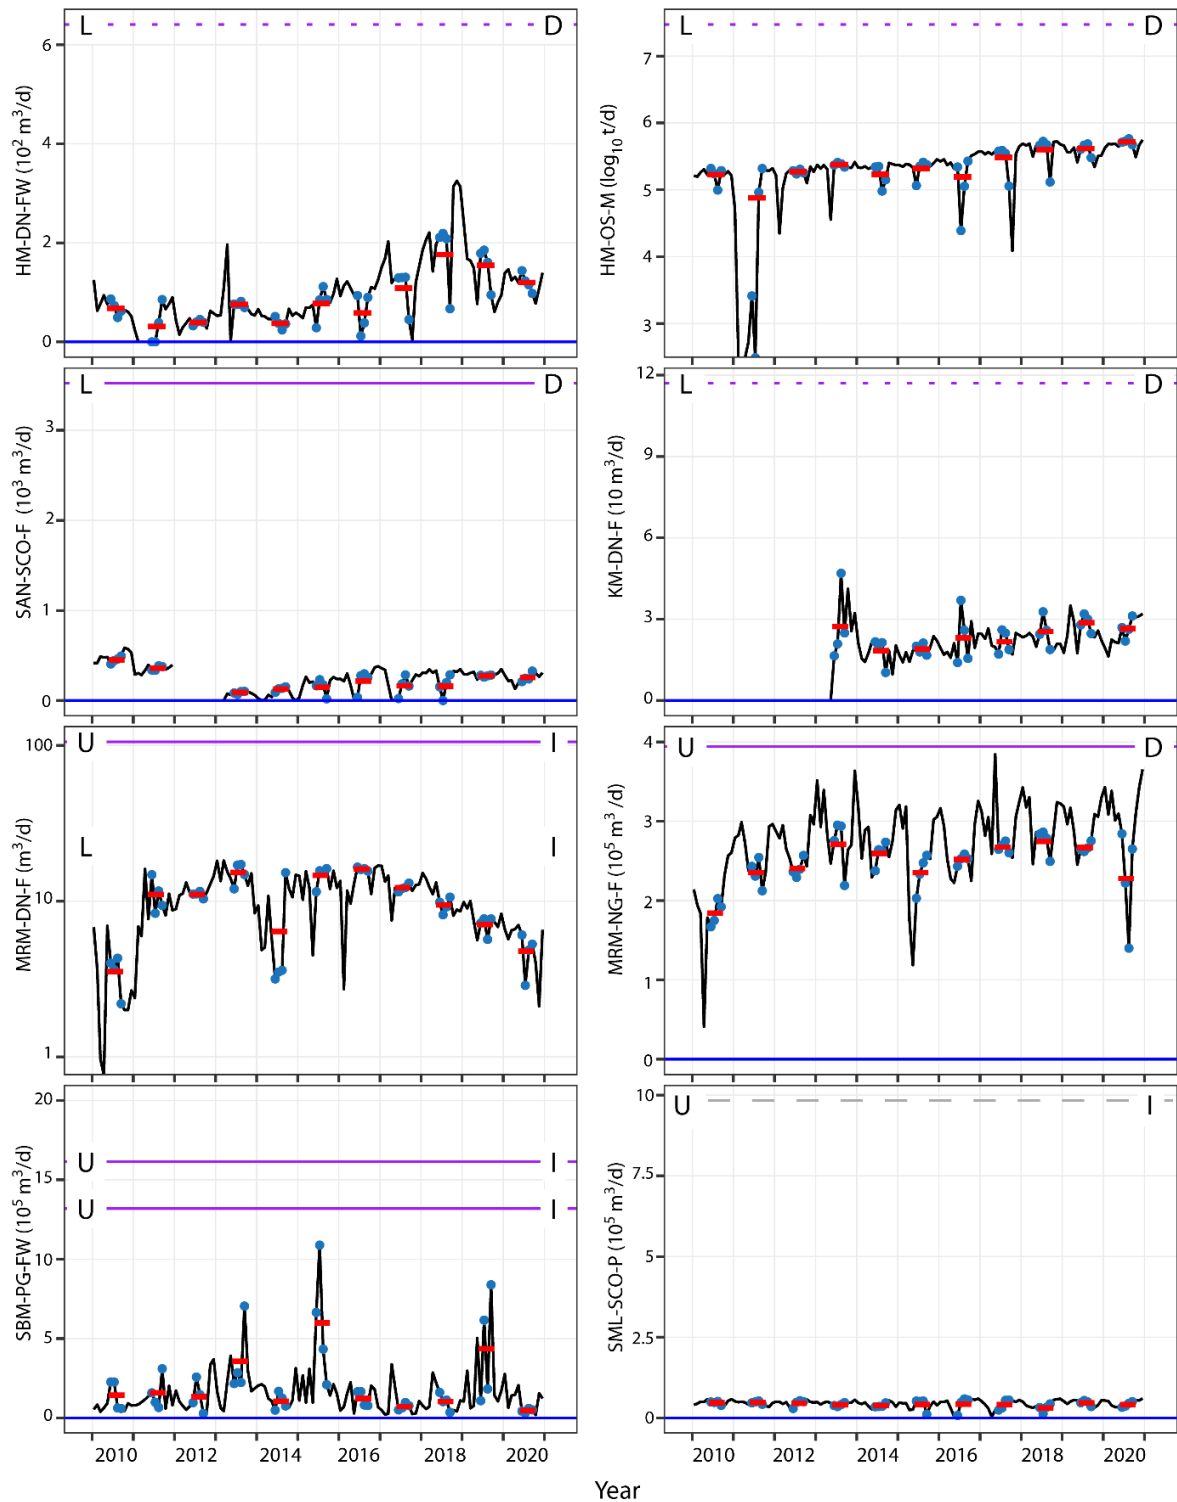

Supplemental Figure S19. Effect Size plots from zero (horizontal blue lines) with greater or lesser industrial activities; purple lines=females; dark gray=males; solid=gonad weight; dashed=liver weight; dotted=body weight; L=lower site; U=upper site; D=decrease in fish measurement; I=increase in fish measurement; black lines = monthly industrial values from 2010-2020; blue dots = June, July, August, September; Red lines = mean summer values for industrial endpoints.

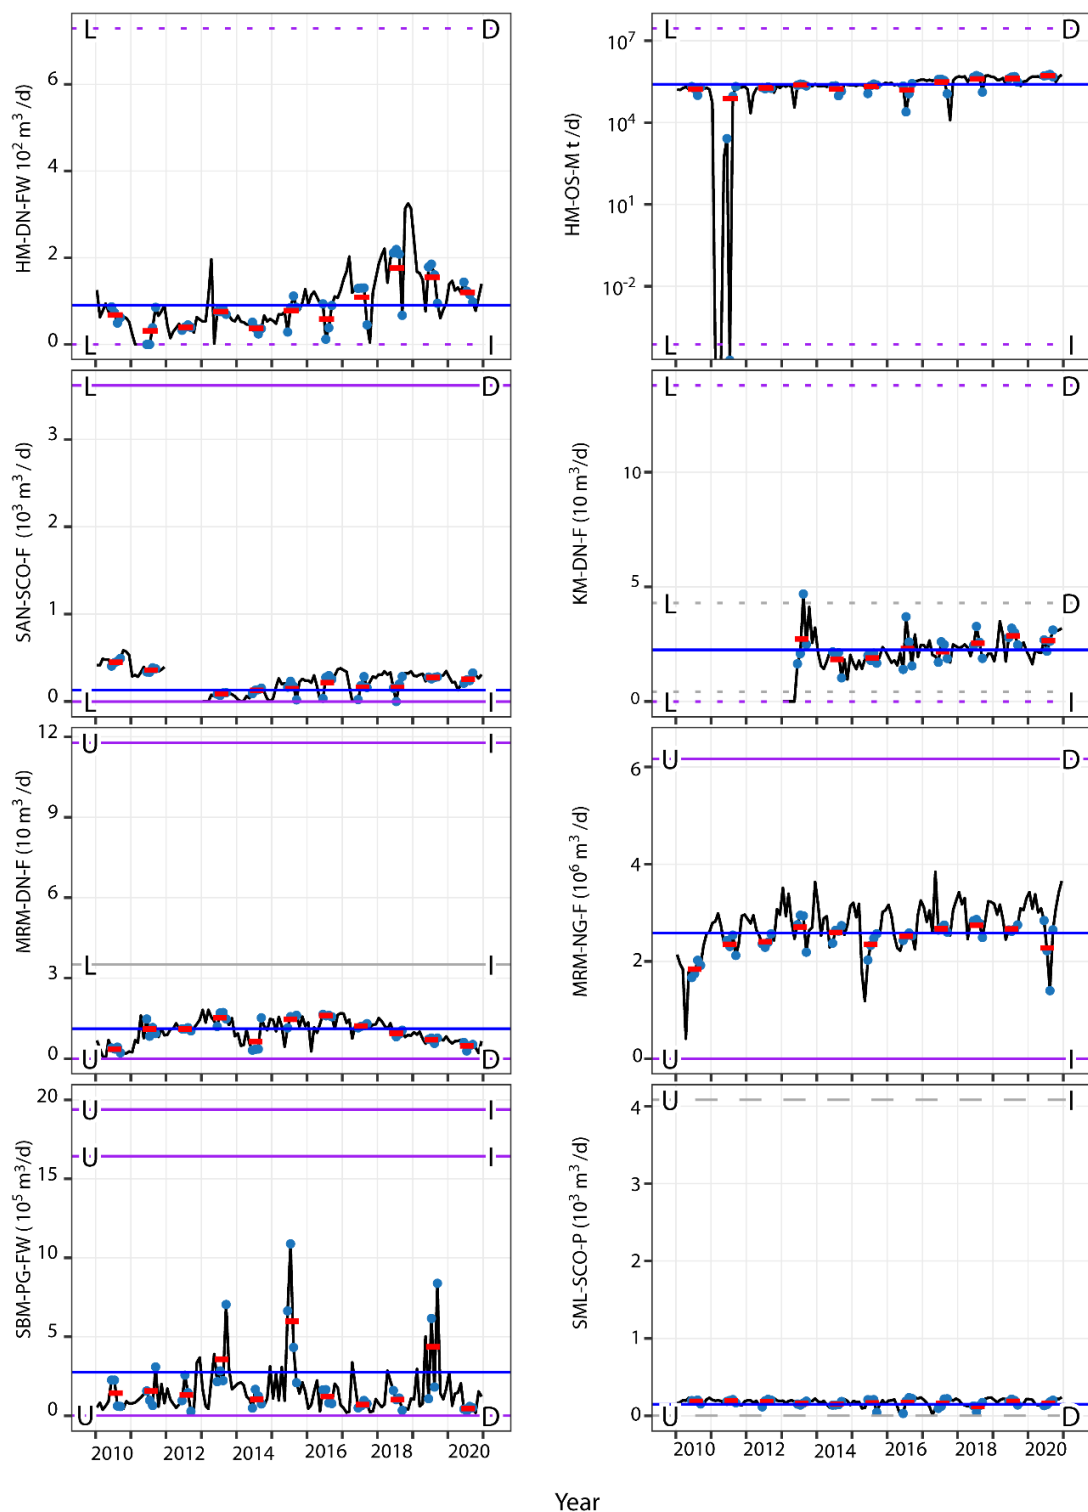

Supplemental Figure S20. Effect Size plots from mean 2013-2015 and 2018 activity levels (horizontal blue lines) with greater or lesser industrial activities; purple lines=females; dark gray=males; solid=gonad weight; dashed=liver weight; dotted=body weight; L=lower site; U=upper site; D=decrease in fish measurement; I=increase in fish measurement; black lines = monthly industrial values from 2010-2020; blue dots = June, July, August, September; Red lines = mean summer values for industrial endpoints.

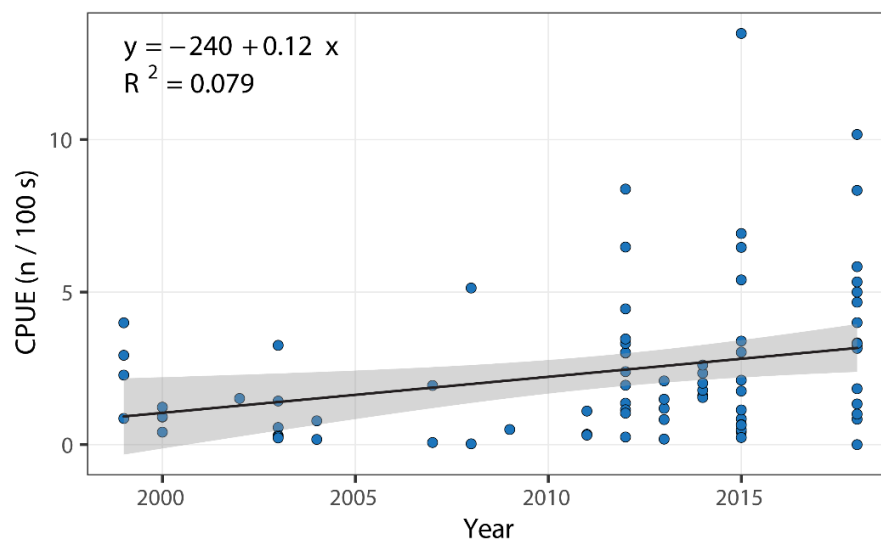

Supplemental Figure S21. Catch-per-unit-effort (CPUE; fish per 100 seconds of electrofishing) for sites in the Ells Basin (data obtained from the Alberta Fish and Wildlife Management Information System; FWMIS; <https://www.alberta.ca/access-fwmis-data.aspx> ).
